# Supplementary material for: Transcription factor TFII-I fine tunes innate properties of B lymphocytes
Source: PubMed Central journal article supplement (PMC9900109; doi:10.3389/fimmu.2023.1067459), 2023-01-23
Supplement: DataSheet_1.pdf [file DataSheet_1.pdf]

Supp. Fig1:

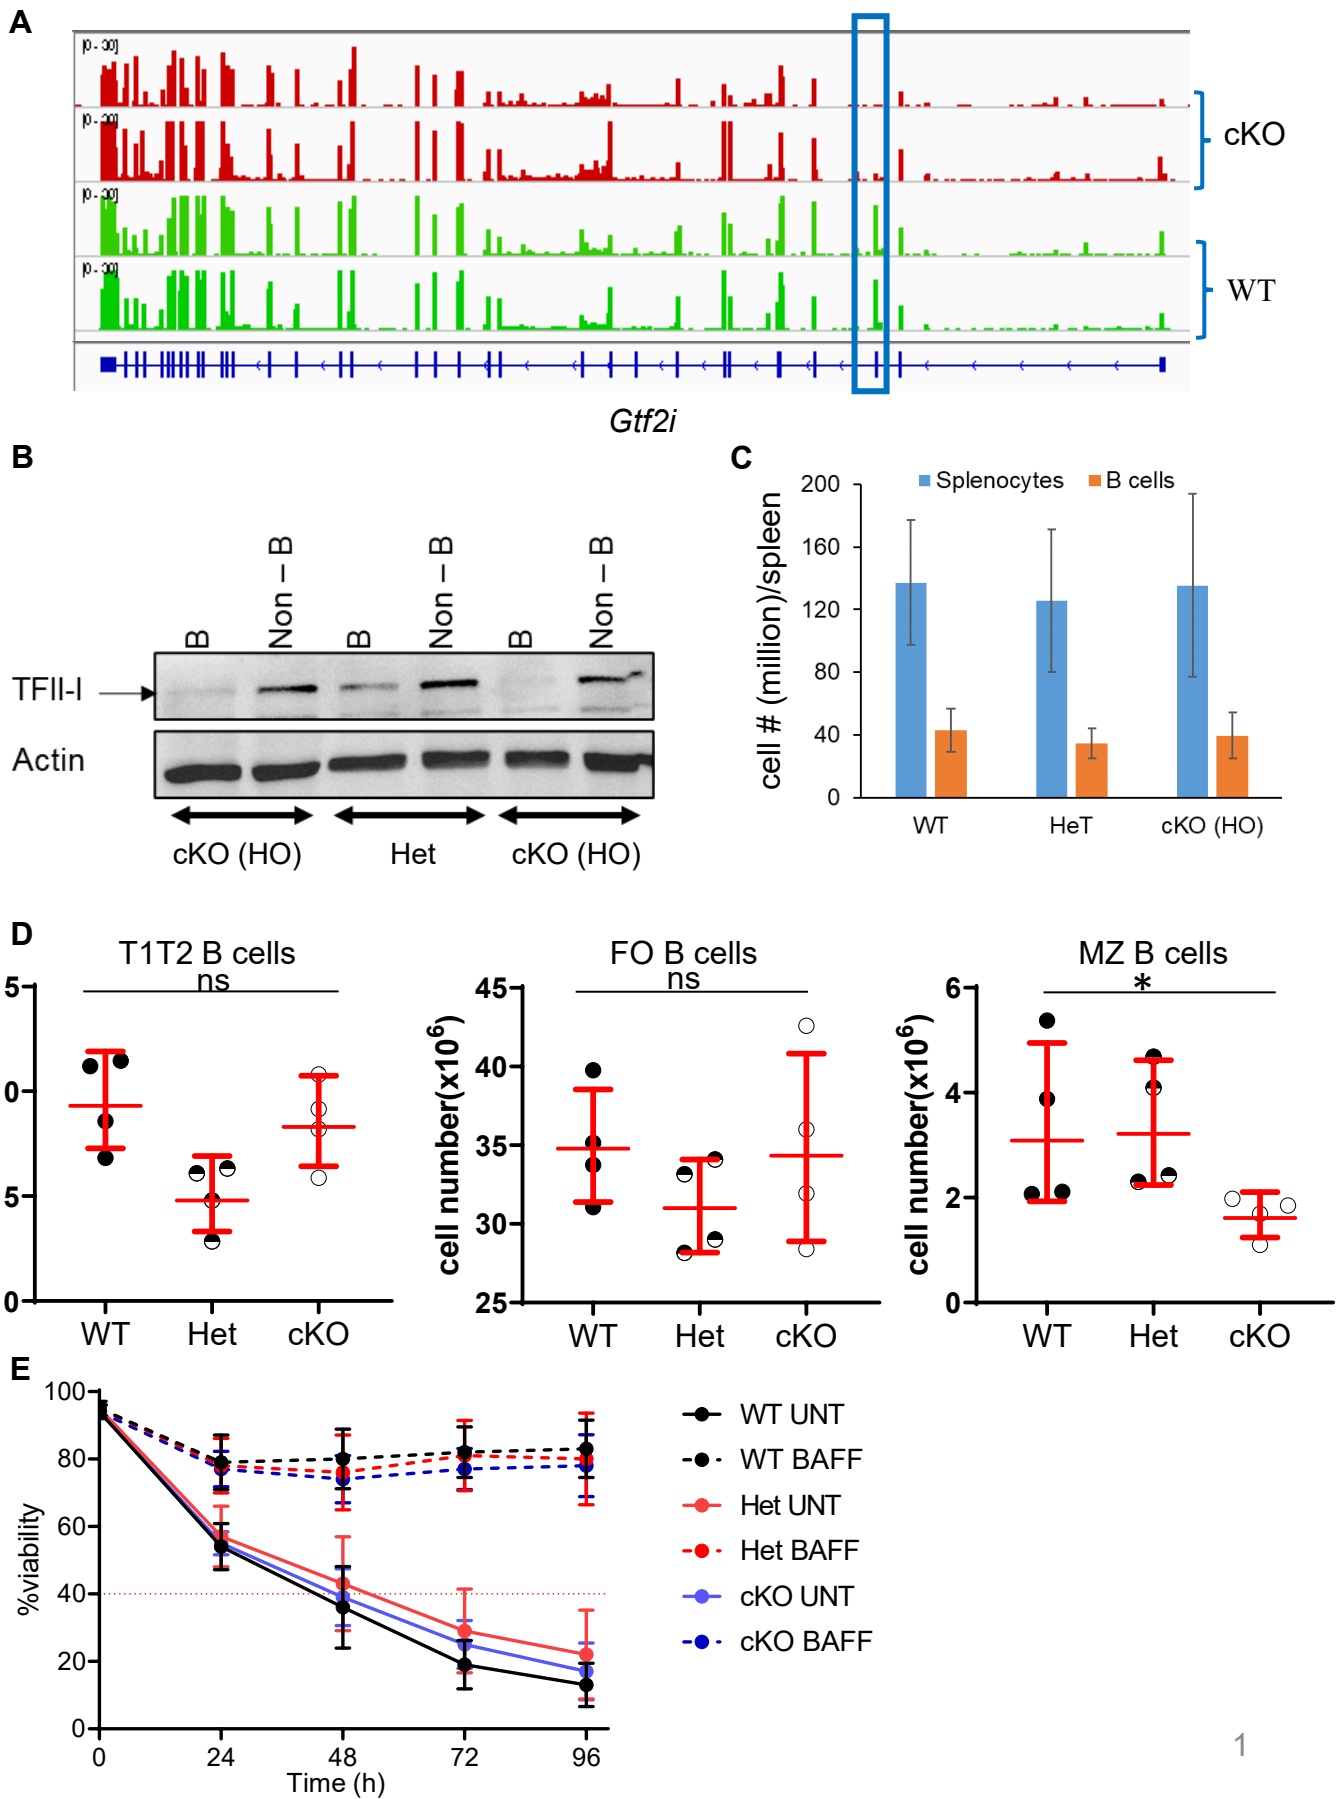

## Supp. Fig1:

- A:** Genome Browser tracks (IGV) from the RNA-Seq analysis of *Gtf2i* gene in WT and cKO B cells. Figure shows duplicate samples of each strain. Box represent exon 3 position of the *Gtf2i* gene.
- B:** Splenic B cells were isolated from the *Gtf2i<sup>fl/fl</sup>CD19-Cre<sup>+</sup>* cKO (HO) and *Gtf2i<sup>fl/+</sup>CD19-Cre* Het mice using Easysep B cell isolation kit by negative selection and the rest of the splenocytes were used as control (Non-B cells). B and non-B cells were lysed in RIPA lysis buffer. Whole cell extracts were fractionated by SDS-PAGE and TFII-I protein expression was analyzed by immunoblotting.  $\beta$ -actin was used to normalize between samples.
- C - D:** Total splenocytes, splenic B cell, T1T2, FO and MZ B cell numbers from cKO (HO), Het and WT mice. Data are representative of 6 independent experiments for splenocytes and B cells and 4 independent experiments for T1T2, FO and MZ B cells..
- E:** Splenic B cells from cKO (HO), Het and WT mice were cultured ex vivo at 37 °C with or without BAFF (200ng/ml) for the indicated times. Viability was determined by propidium iodide staining and flow cytometry. Error bars represent the standard error of the mean between experiments and data are representative of three independent experiments.

Supp. Fig. 2

**A**

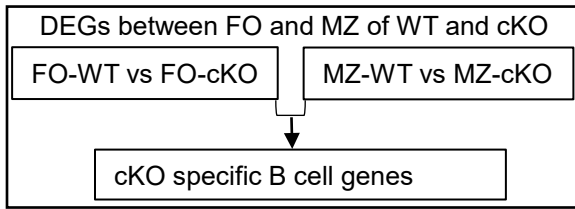

**B**

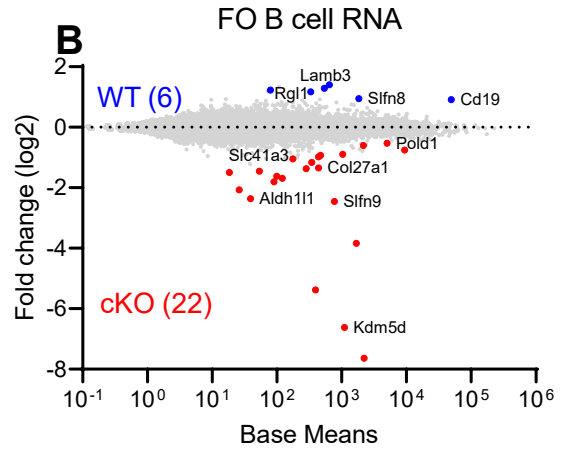

**C**

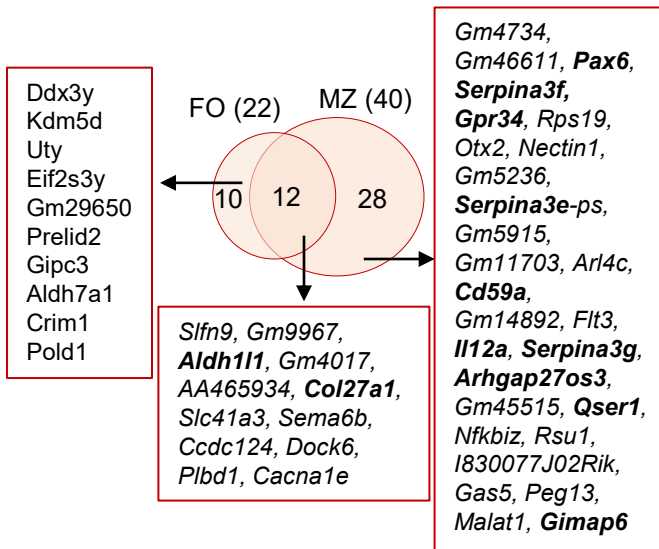

**E**

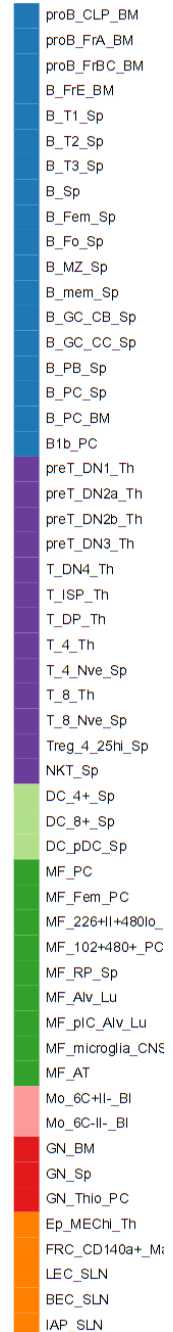

**D**

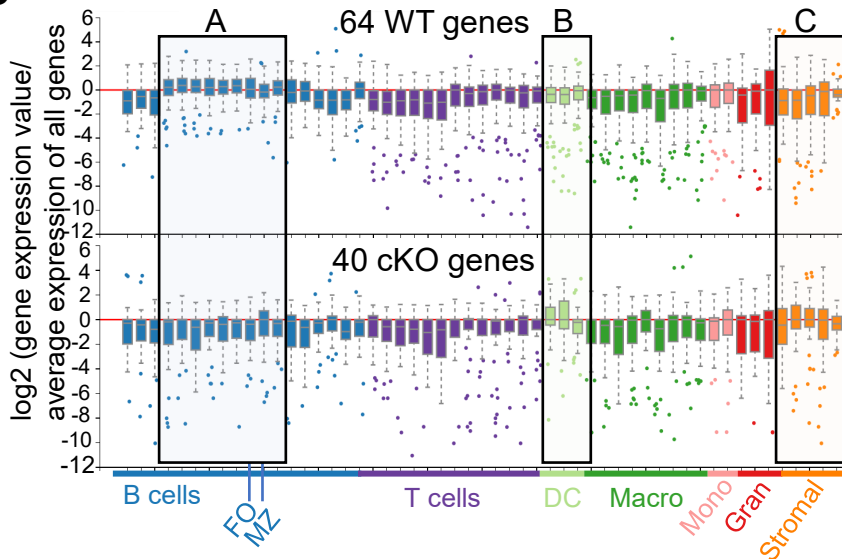

## Supp. Fig. 2:

- A- Scheme demonstrating the comparison profile for the identification of differentially expressed genes (DEGs). FO genes in the WT were compared to the FO genes in the cKO, similarly WT MZ genes were compared to the cKO MZ genes.
- B- MA plot displaying the log fold-change compared with mean expression and showing the DEGs in FO B cells of the WT (6 genes) and of the cKO mice (22 genes).
- C- Venn diagram showing the overlapping of the 40 cKO MZ genes with the 22 cKO FO genes results in 12 genes that are *Gtf2i* cKO B cells specific. A list of the 12 *Gtf2i* cKO unique genes, the 10 cKO FO and the 28 cKO MZ unique genes are shown.
- D- Box and whiskers plot shows the WT 64 MZ genes and the cKO 40 MZ genes and their expression levels in all the immune cells using ImmGen-database. Genes that are enriched in B cell compartments are shown in box A, genes that are enriched in DC are shown in box B while the genes that are enriched in granulocytes and stromal cells are shown in box C.
- E- Scheme showing the cell populations as presented by ImmGen-Database and shown in all the heatmaps that are created from ImmGen-Database in 2B, 2C and Supp. Fig 2D.

Supp. Fig. 3:

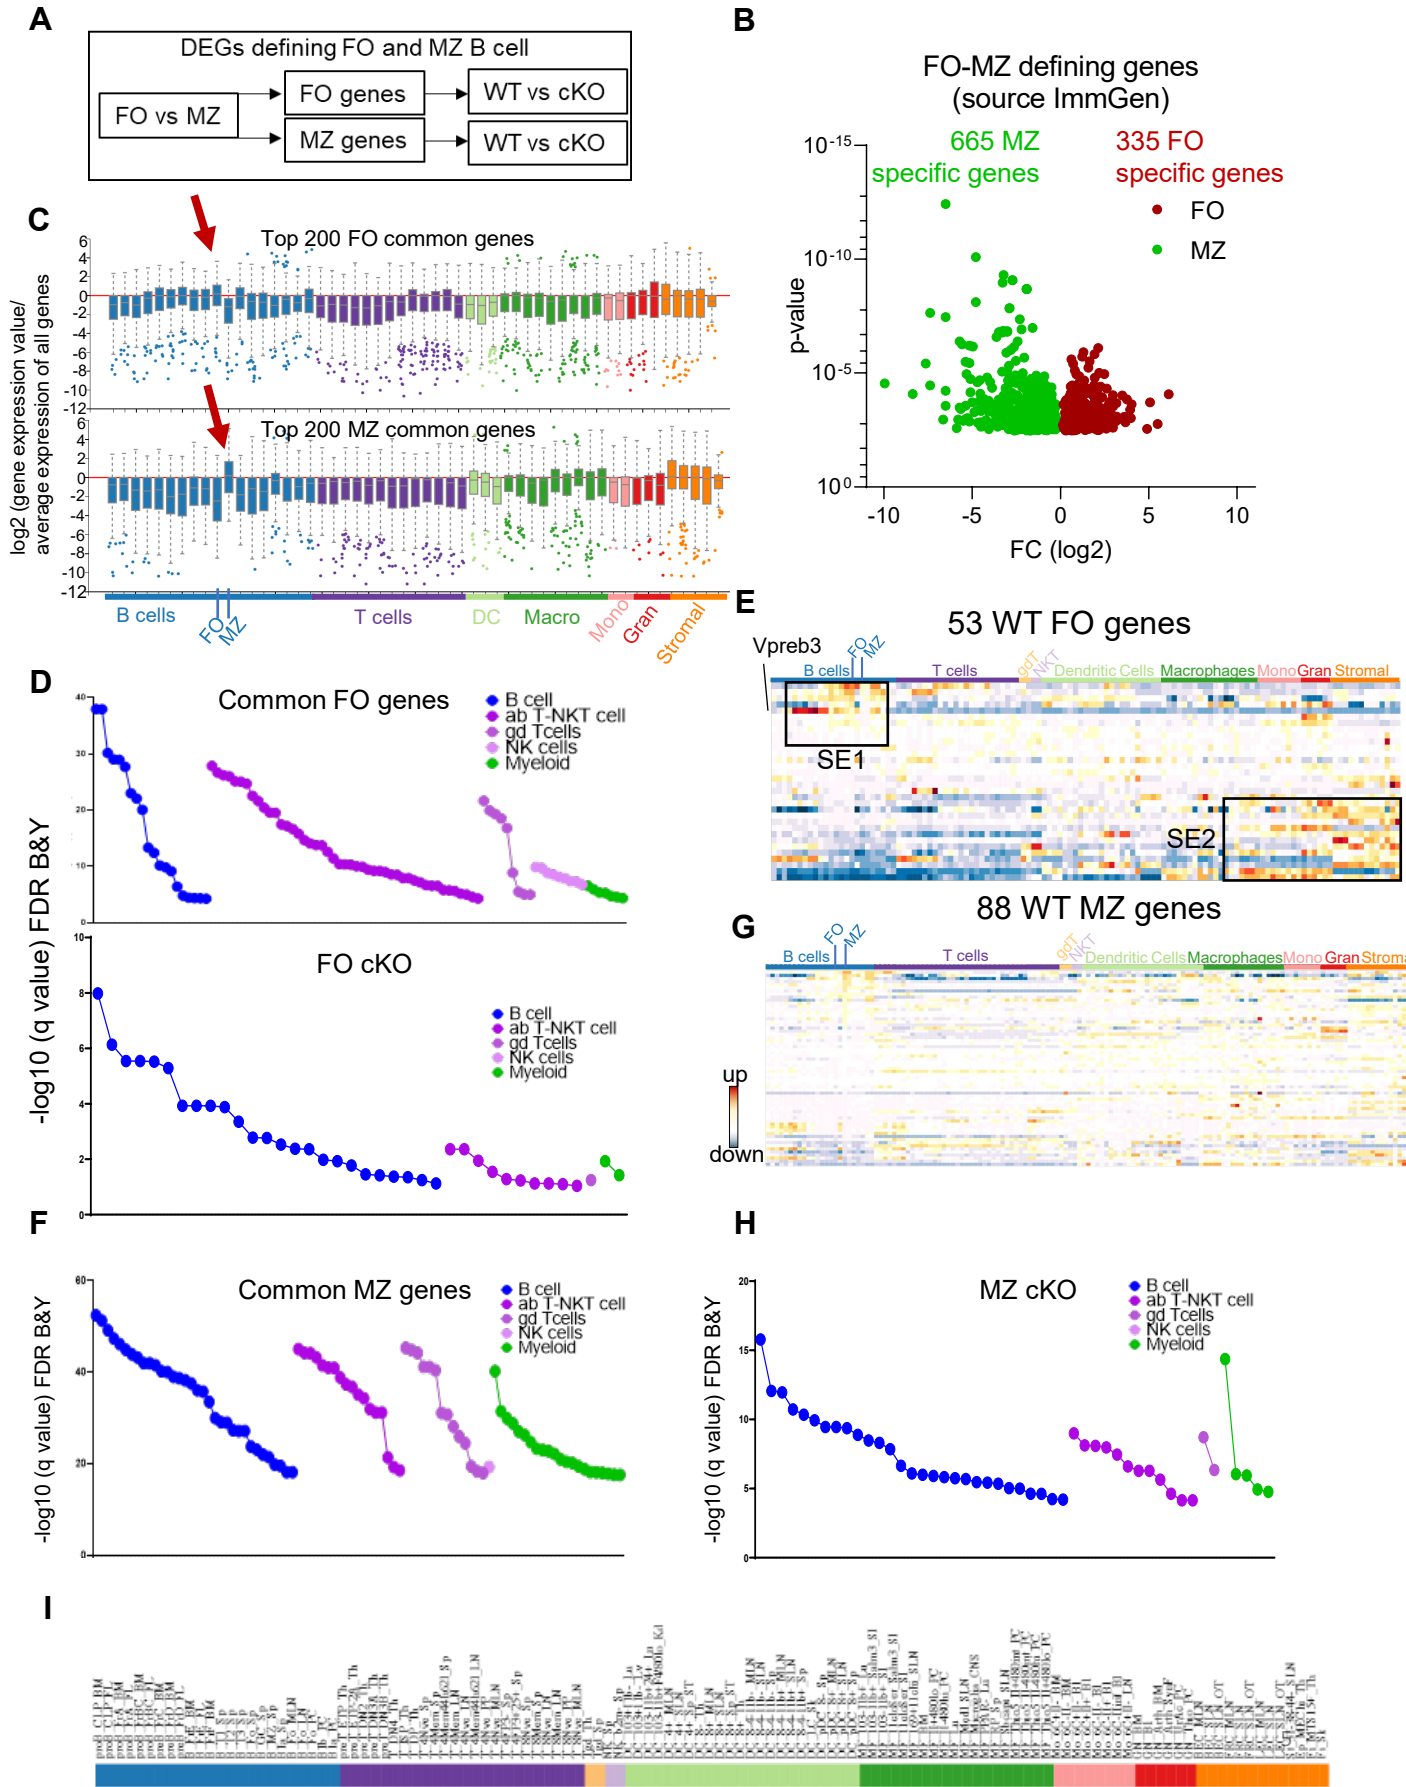

### Supp. Fig. 3:

- A: Scheme demonstrating the comparison profile for the identification of differentially expressed genes (DEGs) between FO and MZ genes in the WT and cKO mice. First FO genes were compared to the MZ genes of the WT mice and similarly FO genes were compared to the MZ genes of the cKO mice. Second the WT FO genes were compared to the cKO FO genes, similarly WT MZ genes were compared to the cKO MZ genes.
- B: Volcano plot showing the FO vs MZ genes of C57BL/6 (WT) mice from the Immunological Genome Database (ImmGen-Database). Data shows 335 FO specific genes versus 665 MZ specific genes.
- C: Box and whiskers plot shows the top 200 common FO genes (common in WT and cKO) and their expression levels in all the immune cells using ImmGen-database. Genes that are enriched in B cell compartments are shown in box SD1, genes that are enriched in T cell compartments are shown in box SD2 while the genes that are enriched in monocytes, granulocytes and stromal cells are shown in box SD3.
- D, F and H: Point plots showing the significantly enriched genes in the different populations of the various immune cells that was identified in the ImmGen-database as seen in Fig. 3E – F and Fig. 4C – D. According to these significant genes the boxes were plotted in Fig. 3E – F and Fig. 4C – D.
- E: Heatmap showing the expression levels of the 53 WT specific FO genes in the different immune cells when they were input in the ImmGen-Database. Box SE1 shows the expression levels of these genes in the different subsets of B cells. Box SE2 shows their expression levels in the monocytes, granulocytes and stromal cells.
- G: Heatmap like in E but for the 88 WT MZ genes.
- I: Scheme showing the cell populations as presented by ImmGen-Database and shown in all the heatmaps that are created from ImmGen-Database (Fig. 3E - F, Fig. 4C – D and Supp Fig. 3E – 3G).

Supp. Fig. 4:

**A**

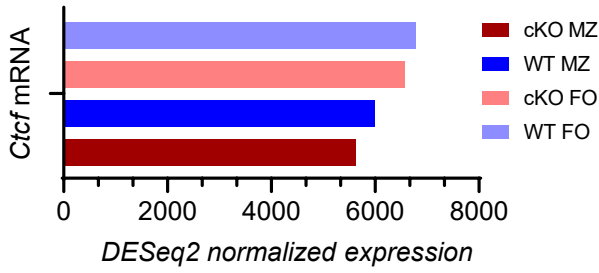

**B**

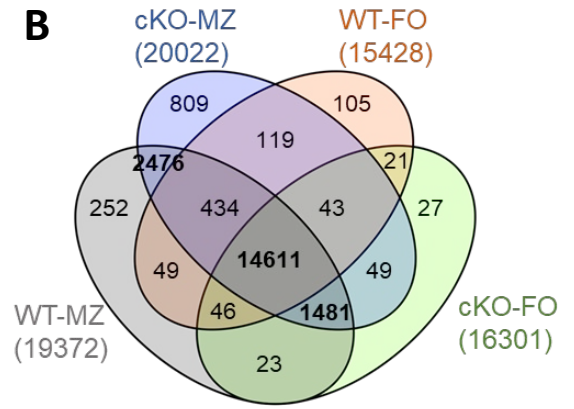

**C**

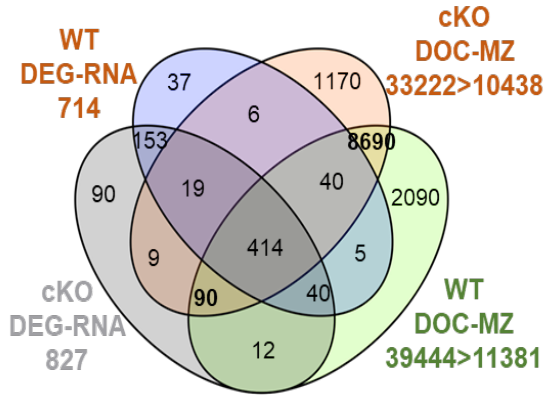

**D**

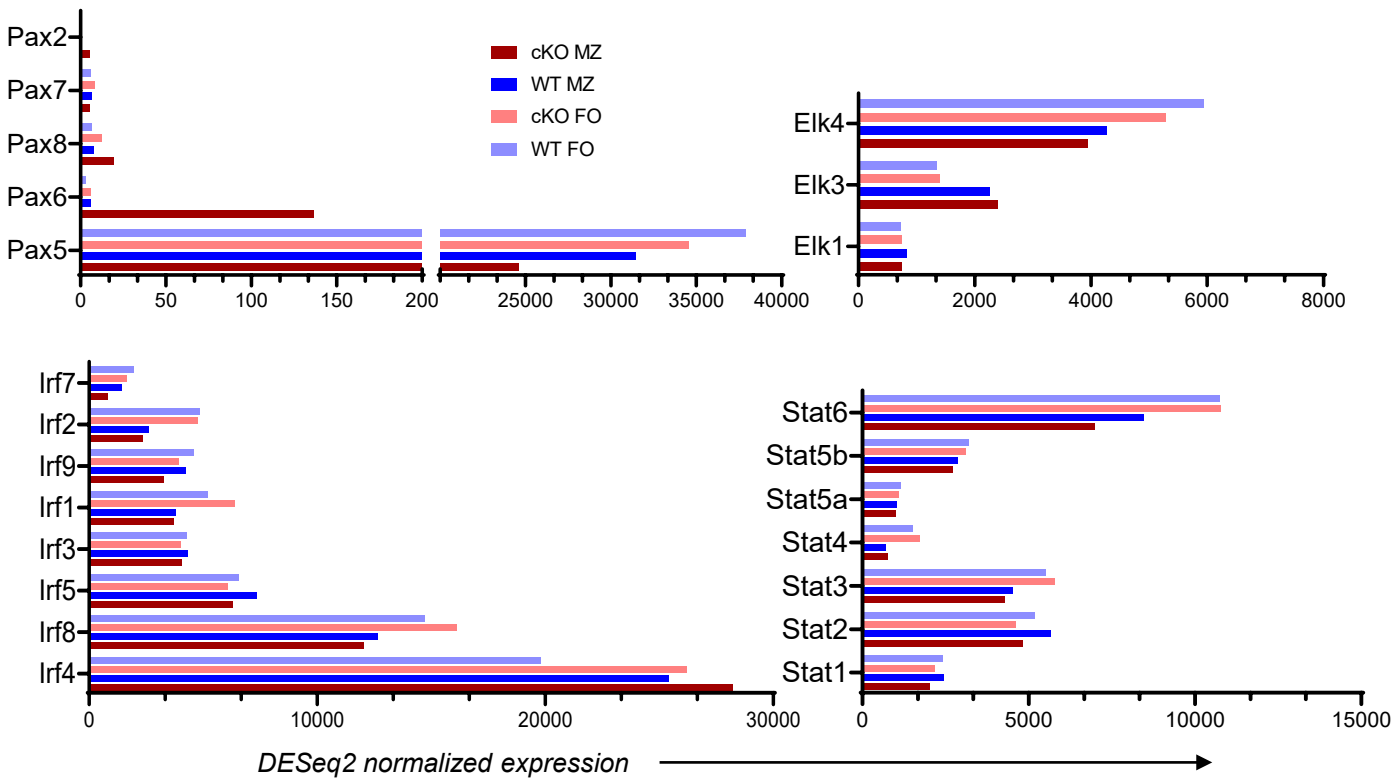

## Supp. Fig. 4:

A: *Ctcf* mRNA expression levels of MZ and FO B cells of WT and cKO mice.

B: Open chromatin regions as in Fig.5A were annotated to its associated genes using annotated.pl algorithm in HOMER. These genes were further compared using 4-way Venn to identify shared and unique genes for indicated B cell subsets from WT and cKO B cells.

C: Differentially open chromatin of MZ B cells as in Fig. 6A were annotated to their associated genes (as in Supp Fig. 4B) for WT and cKO B cells. These annotated genes were then overlapped with the MZ DEGs that identified from the RNA-seq data and shown in Fig. 3A-B.

D: DESeq2 normalized mRNA expression levels of the different transcription factor family members.



**Supp Table 1**

| <b>Gene</b> | <b>WT FO</b> | <b>cKO FO</b> | <b>WT MZ</b> | <b>cKO MZ</b> |
|-------------|--------------|---------------|--------------|---------------|
| Ryr2        | 382.01       | 308.66        | 26.11        | 20.74         |
| Rgl1        | 840.01       | 346.27        | 92.18        | 51.68         |
| Ngfr        | 304.56       | 181.56        | 28.20        | 12.13         |
| Slc4a11     | 385.75       | 337.21        | 42.33        | 23.27         |
| Cacna1i     | 10115.56     | 9013.73       | 1325.77      | 736.09        |
| Lifr        | 238.28       | 180.59        | 21.29        | 10.62         |
| Crisp3      | 467.41       | 425.19        | 60.14        | 32.03         |
| Gm11346     | 1004.75      | 939.90        | 134.31       | 135.64        |
| Gm11690     | 241.05       | 234.51        | 22.99        | 12.13         |
| Prss12      | 173.72       | 346.21        | 15.88        | 34.11         |
| Gm39383     | 119.40       | 60.98         | 7.45         | 5.52          |
| Rflnb       | 1504.49      | 1363.37       | 262.48       | 256.42        |
| Slco5a1     | 159.74       | 107.47        | 16.56        | 11.67         |
| Crip3       | 188.94       | 160.24        | 24.49        | 26.83         |
| Gm19951     | 2265.94      | 1999.93       | 414.43       | 338.56        |
| Cdk1        | 290.00       | 253.07        | 47.99        | 36.55         |
| Gad1        | 496.18       | 280.77        | 77.98        | 28.03         |
| Mapk12      | 768.62       | 676.85        | 127.95       | 99.40         |
| Col27a1     | 402.53       | 1097.73       | 71.89        | 183.64        |
| Dmwd        | 423.58       | 267.75        | 75.15        | 33.94         |
| Fry         | 3008.63      | 2558.38       | 593.10       | 469.09        |
| Ndr1        | 207.07       | 253.46        | 27.10        | 19.78         |
| Dusp3       | 617.27       | 546.83        | 106.40       | 75.51         |
| Wfdc17      | 127.89       | 163.77        | 15.26        | 18.63         |
| Mapk11      | 4319.14      | 4139.79       | 910.05       | 748.53        |
| Fam102b     | 617.18       | 592.88        | 121.46       | 129.71        |
| Loxhd1      | 69.04        | 41.40         | 5.12         | 2.54          |
| Hcrtr2      | 192.74       | 189.37        | 23.41        | 13.13         |
| Vim         | 9654.25      | 9311.42       | 1943.21      | 1442.64       |
| Dmpk        | 268.23       | 148.22        | 46.40        | 28.51         |
| Trib2       | 2570.02      | 3031.38       | 537.25       | 583.53        |
| L1cam       | 652.07       | 645.44        | 136.79       | 108.97        |
| Alcam       | 977.35       | 813.09        | 207.07       | 147.38        |
| Lamp3       | 179.85       | 165.78        | 31.77        | 42.17         |
| Fcgrt       | 976.48       | 930.94        | 203.47       | 170.61        |
| Fcer2a      | 30480.27     | 37351.30      | 4740.69      | 6476.49       |
| Cd55        | 20241.06     | 22592.55      | 4685.17      | 5972.21       |
| Lrrc23      | 69.77        | 69.27         | 7.39         | 3.56          |
| Itga6       | 936.41       | 1058.55       | 194.52       | 176.75        |
| Kcnb1       | 540.18       | 485.23        | 111.60       | 103.97        |
| Iqcn        | 134.84       | 117.90        | 7.53         | 8.68          |
| Prkcg       | 145.87       | 125.84        | 24.94        | 14.68         |
| Gpr146      | 935.40       | 809.83        | 209.70       | 173.90        |
| Ttbk1       | 435.81       | 744.71        | 92.42        | 133.63        |

|             |          |          |         |         |
|-------------|----------|----------|---------|---------|
| Gadd45g     | 908.43   | 1074.66  | 193.68  | 270.50  |
| Gm45552     | 784.76   | 673.40   | 168.45  | 140.88  |
| Sorcs2      | 185.04   | 118.01   | 29.50   | 18.65   |
| Sdc1        | 361.64   | 426.89   | 63.75   | 45.01   |
| Ccdc114     | 178.82   | 153.75   | 36.81   | 38.10   |
| Itgb7       | 7168.33  | 7242.77  | 1818.80 | 1592.37 |
| Bach2       | 9186.68  | 8906.56  | 2369.30 | 2356.71 |
| Rbpms       | 228.89   | 369.06   | 50.31   | 99.18   |
| Nacad       | 340.94   | 272.76   | 76.44   | 49.75   |
| Stac2       | 1221.96  | 1119.25  | 307.25  | 274.65  |
| Gm15675     | 4079.17  | 3707.58  | 994.90  | 965.87  |
| Bcl6        | 3553.62  | 3800.44  | 925.68  | 787.26  |
| Atp1b1      | 429.02   | 297.60   | 96.57   | 58.45   |
| Maf         | 274.64   | 464.16   | 53.04   | 88.01   |
| Ahnak       | 7515.09  | 5912.97  | 1224.37 | 472.23  |
| Ssbp2       | 270.06   | 381.56   | 59.85   | 91.13   |
| Gm34225     | 96.28    | 124.91   | 14.89   | 18.30   |
| Pgap1       | 9030.20  | 9151.93  | 2519.39 | 2309.79 |
| Emp3        | 2447.44  | 2217.07  | 652.46  | 486.36  |
| Gm8369      | 4834.54  | 5151.18  | 1308.75 | 1220.55 |
| Gmfg        | 3794.03  | 4459.24  | 1056.94 | 1423.81 |
| Qrfp        | 137.97   | 137.42   | 29.07   | 24.37   |
| Slc2a6      | 564.91   | 627.62   | 148.01  | 155.87  |
| Enpp1       | 1385.59  | 1226.09  | 392.38  | 336.59  |
| Myadm       | 1530.87  | 1164.66  | 202.76  | 94.33   |
| Gm37352     | 377.77   | 341.52   | 91.15   | 60.10   |
| Cd55os      | 1530.67  | 1306.68  | 403.45  | 357.91  |
| Scimp       | 438.61   | 393.64   | 112.62  | 91.44   |
| Crybg3      | 1307.38  | 1234.90  | 362.17  | 313.77  |
| Tmprss13    | 60.13    | 61.32    | 8.78    | 3.06    |
| Zfp318      | 16463.98 | 15951.14 | 5009.44 | 4303.39 |
| Ldlrad4     | 88.58    | 113.41   | 19.08   | 22.27   |
| Dll1        | 157.05   | 199.35   | 37.77   | 32.07   |
| Rnf144a     | 4265.08  | 3896.73  | 1301.11 | 979.23  |
| Mex3b       | 229.34   | 209.42   | 62.26   | 56.32   |
| Tctn1       | 1602.98  | 1487.08  | 506.12  | 431.26  |
| Kcnj1       | 65.44    | 73.12    | 6.88    | 8.08    |
| Lef1        | 106.14   | 120.46   | 15.99   | 12.13   |
| Csrp2       | 263.09   | 238.86   | 63.95   | 41.36   |
| Mturn       | 424.20   | 357.14   | 129.99  | 132.22  |
| Gm8251      | 155.11   | 99.61    | 30.77   | 18.18   |
| Gm43196     | 192.12   | 194.87   | 54.53   | 61.25   |
| B3gnt5      | 11640.16 | 12188.82 | 3823.36 | 3806.76 |
| 4632428C04F | 192.27   | 172.37   | 44.87   | 37.27   |
| Gm16214     | 173.44   | 157.72   | 48.93   | 42.07   |
| Cdc25b      | 3949.16  | 4005.77  | 1266.81 | 1171.79 |
| Rassf3      | 4198.63  | 4447.44  | 1377.03 | 1323.84 |

|             |          |          |          |          |
|-------------|----------|----------|----------|----------|
| Ldlr        | 1235.35  | 1128.55  | 358.82   | 306.09   |
| Cdkn2d      | 928.71   | 868.49   | 276.31   | 247.34   |
| Vmn2r97     | 396.61   | 330.29   | 120.08   | 86.66    |
| Arhgef18    | 12799.17 | 12138.40 | 4226.16  | 3849.49  |
| Cd200       | 1501.94  | 1824.45  | 480.64   | 476.65   |
| Gm43769     | 48.26    | 73.86    | 7.87     | 14.78    |
| Cdkn1a      | 85.54    | 73.69    | 16.73    | 14.13    |
| Pygm        | 225.26   | 177.93   | 68.55    | 61.92    |
| Lfng        | 1877.89  | 2027.88  | 631.96   | 638.76   |
| Cpm         | 2923.84  | 2742.41  | 971.87   | 823.46   |
| Trim59      | 2273.05  | 2392.27  | 725.48   | 865.84   |
| Arhgef3     | 7978.86  | 8223.56  | 2685.47  | 2830.30  |
| Tent5a      | 1418.33  | 1033.94  | 474.54   | 316.10   |
| Igf1r       | 98.85    | 171.33   | 25.90    | 27.38    |
| Tle1        | 473.12   | 508.01   | 151.01   | 131.33   |
| B3gnt7      | 607.96   | 701.21   | 174.69   | 131.28   |
| Gm23037     | 65.51    | 70.83    | 14.53    | 13.71    |
| Bach2os     | 126.93   | 144.82   | 32.47    | 29.85    |
| Smad1       | 233.65   | 124.90   | 68.66    | 43.98    |
| Tagap       | 2551.37  | 2765.03  | 885.71   | 941.67   |
| Ighv1-5     | 197.21   | 267.37   | 56.99    | 90.53    |
| Cmah        | 10453.48 | 8161.25  | 3495.26  | 2827.21  |
| Rgcc        | 163.47   | 201.44   | 25.66    | 22.91    |
| Adap1       | 673.14   | 759.20   | 234.37   | 246.06   |
| Il4ra       | 12800.42 | 9503.37  | 4678.31  | 3343.54  |
| Bmf         | 2061.03  | 1561.88  | 748.24   | 450.63   |
| Neur13      | 9284.40  | 9114.96  | 3358.23  | 3437.41  |
| Gm5511      | 118.98   | 123.87   | 32.95    | 44.32    |
| Rhebl1      | 523.10   | 513.23   | 183.28   | 232.70   |
| Trim46      | 73.25    | 38.66    | 15.17    | 6.56     |
| Stard8      | 76.56    | 123.65   | 17.21    | 40.32    |
| Orai2       | 2617.79  | 2358.41  | 962.01   | 920.95   |
| Sell        | 30972.08 | 29597.09 | 11266.44 | 13080.35 |
| S100a10     | 3308.44  | 3584.51  | 1172.27  | 1054.89  |
| Diras2      | 172.35   | 205.85   | 55.12    | 53.77    |
| Fchsd2      | 13047.43 | 13740.93 | 4946.70  | 5053.01  |
| Tnik        | 568.34   | 707.28   | 203.51   | 240.32   |
| Sele        | 61.84    | 59.25    | 11.55    | 7.54     |
| Kctd14      | 468.29   | 289.32   | 69.63    | 28.82    |
| Spns2       | 2178.00  | 1866.28  | 793.72   | 561.73   |
| Pde4c       | 121.68   | 105.03   | 33.69    | 22.80    |
| Scn8a       | 85.65    | 82.36    | 20.78    | 13.80    |
| 1700001K23F | 99.23    | 94.62    | 25.37    | 25.28    |
| Aida        | 2342.06  | 2201.24  | 886.41   | 831.61   |
| Itih5       | 452.24   | 321.00   | 152.61   | 109.06   |
| Sfxn3       | 1347.92  | 1274.14  | 501.72   | 509.15   |
| Serinc5     | 1442.83  | 1181.38  | 513.71   | 316.62   |

|             |          |          |          |          |
|-------------|----------|----------|----------|----------|
| Pde2a       | 29.86    | 61.11    | 3.28     | 5.02     |
| Sbk1        | 12795.27 | 11593.17 | 4975.36  | 3397.69  |
| 4932442E05F | 206.84   | 222.80   | 67.86    | 66.99    |
| Ccr7        | 15259.10 | 15424.40 | 4507.61  | 3558.71  |
| Gm26532     | 552.67   | 523.59   | 89.61    | 64.93    |
| Gm36931     | 80.55    | 90.71    | 19.17    | 17.77    |
| Cbx7        | 11932.12 | 11416.15 | 4692.87  | 4693.15  |
| Zfp608      | 4103.13  | 4348.79  | 1577.44  | 1387.29  |
| Lmo2        | 7104.82  | 6372.44  | 2747.05  | 2832.89  |
| Nectin1     | 115.48   | 268.49   | 35.51    | 114.57   |
| Hvcn1       | 9139.81  | 8864.88  | 3548.76  | 2684.06  |
| Selp        | 36.13    | 58.52    | 6.94     | 15.21    |
| Sgpp2       | 146.72   | 126.47   | 46.58    | 33.82    |
| Gimap3      | 10173.31 | 9331.27  | 4035.91  | 3955.27  |
| Gm8995      | 18953.59 | 17197.63 | 7505.14  | 7116.62  |
| S1pr4       | 3037.43  | 2668.09  | 1103.95  | 822.93   |
| Ifnlr1      | 122.89   | 156.04   | 40.80    | 29.39    |
| 4930511E03F | 43.94    | 21.99    | 5.94     | 0.52     |
| Sorl1       | 22706.14 | 21079.89 | 9299.09  | 7777.04  |
| Trim16      | 27.10    | 30.04    | 2.77     | 5.04     |
| Cpne5       | 116.17   | 104.07   | 33.72    | 18.65    |
| Ank         | 416.05   | 461.12   | 162.44   | 192.97   |
| Gm19261     | 134.43   | 109.50   | 42.21    | 33.84    |
| Pgpep1l     | 54.88    | 71.07    | 11.49    | 12.65    |
| Gm48038     | 52.17    | 40.51    | 11.58    | 10.65    |
| Dyrk2       | 2409.17  | 2324.78  | 974.27   | 953.95   |
| Slc4a3      | 57.99    | 39.50    | 13.45    | 6.12     |
| Adamts6     | 1758.92  | 1425.40  | 700.58   | 636.33   |
| Gm35065     | 20.13    | 30.11    | 0.00     | 1.51     |
| Rasa3       | 14193.39 | 13790.57 | 5803.38  | 5125.13  |
| Cisd3       | 379.73   | 375.19   | 145.50   | 150.20   |
| Gm19585     | 349.45   | 300.33   | 136.33   | 120.57   |
| Gm15880     | 104.33   | 120.96   | 32.37    | 36.71    |
| Maml3       | 431.45   | 526.83   | 168.13   | 195.76   |
| Ccdc180     | 83.25    | 124.65   | 26.98    | 44.63    |
| Fam107b     | 16520.55 | 16431.24 | 5532.99  | 4934.32  |
| Sfn         | 944.40   | 1084.12  | 378.96   | 408.13   |
| Abca1       | 6645.63  | 6769.47  | 2727.43  | 2387.11  |
| Extl1       | 272.10   | 244.19   | 103.74   | 94.67    |
| Cd93        | 530.55   | 579.98   | 175.02   | 128.94   |
| Abca6       | 50.35    | 61.44    | 13.05    | 18.18    |
| Ighd        | 57427.08 | 63616.26 | 16195.54 | 18339.50 |
| Capn5       | 886.66   | 743.61   | 354.61   | 323.30   |
| Zc3hav1l    | 225.98   | 264.27   | 85.54    | 59.44    |
| Itgb3       | 1242.46  | 1137.99  | 505.89   | 498.13   |
| Bbs9        | 728.14   | 864.80   | 302.48   | 393.83   |
| Gm15987     | 1193.93  | 1208.25  | 491.85   | 495.17   |

|             |          |          |          |          |
|-------------|----------|----------|----------|----------|
| H3f3a       | 2553.24  | 2423.31  | 1077.67  | 990.33   |
| Antxr2      | 740.94   | 702.19   | 302.72   | 260.42   |
| Satb1       | 7112.76  | 7298.97  | 2855.16  | 2336.45  |
| Cc2d2b      | 86.09    | 98.74    | 25.57    | 31.26    |
| Cldn10      | 101.27   | 86.56    | 31.85    | 32.27    |
| Slc26a10    | 465.01   | 522.24   | 190.47   | 204.23   |
| Amn         | 73.07    | 65.41    | 20.73    | 16.14    |
| Tgfb3       | 161.89   | 139.89   | 56.98    | 43.29    |
| Lmna        | 163.52   | 165.87   | 39.50    | 39.01    |
| Ddah2       | 119.86   | 115.48   | 43.09    | 42.98    |
| Dnah8       | 791.94   | 554.12   | 191.98   | 95.31    |
| Mybpc2      | 334.82   | 324.38   | 134.17   | 101.46   |
| Sh3bp5      | 9024.40  | 8759.53  | 3936.97  | 3460.45  |
| 2810405F17F | 55.57    | 58.42    | 13.90    | 15.69    |
| Tcp11l2     | 4973.60  | 4577.67  | 2176.46  | 1865.99  |
| Trib3       | 53.53    | 58.19    | 13.68    | 13.20    |
| Il6ra       | 1365.01  | 1710.33  | 572.86   | 546.10   |
| Gm16589     | 173.71   | 148.60   | 67.81    | 62.31    |
| Lbh         | 14264.22 | 12824.69 | 6289.63  | 5299.52  |
| Add1        | 10321.79 | 10171.45 | 4560.59  | 4258.46  |
| Xylt1       | 3613.00  | 3349.66  | 1583.81  | 1273.53  |
| F2rl1       | 30.03    | 52.14    | 3.68     | 9.23     |
| Tnnt3       | 156.23   | 143.16   | 59.43    | 47.60    |
| Tuba1a      | 497.35   | 540.53   | 202.81   | 195.38   |
| Slc52a3     | 78.66    | 59.04    | 25.80    | 14.69    |
| H1f2        | 1208.65  | 1701.01  | 521.19   | 608.99   |
| Fli1        | 4792.99  | 4265.21  | 2100.33  | 1722.23  |
| Akap12      | 1096.65  | 811.12   | 435.60   | 303.56   |
| Nab2        | 1088.96  | 814.34   | 473.29   | 252.98   |
| Ripor2      | 15052.86 | 13704.05 | 6651.48  | 5225.49  |
| Arhgap31    | 237.80   | 233.05   | 75.15    | 53.69    |
| Slc15a3     | 480.79   | 370.59   | 192.71   | 130.28   |
| Nsmce1      | 1338.66  | 1254.71  | 572.71   | 510.52   |
| Stum        | 50.38    | 79.23    | 15.37    | 12.15    |
| Flna        | 31897.05 | 28359.81 | 14432.30 | 11688.91 |
| Scml4       | 2952.80  | 2757.85  | 1306.91  | 1319.98  |
| Igsf9       | 293.70   | 351.05   | 115.28   | 101.38   |
| Ssh2        | 11598.44 | 11676.21 | 5060.13  | 4681.70  |
| Samhd1      | 19752.04 | 19496.53 | 8887.15  | 8556.76  |
| Vsir        | 702.01   | 634.33   | 289.83   | 233.99   |
| Gm6421      | 2151.83  | 2005.62  | 973.91   | 855.15   |
| Eps8        | 286.80   | 306.47   | 116.13   | 98.49    |
| Gm47782     | 20.76    | 33.18    | 1.87     | 2.51     |
| Galc        | 88.79    | 90.58    | 31.45    | 12.73    |
| Baiap2      | 580.89   | 582.09   | 256.38   | 157.19   |
| Prr7        | 369.42   | 364.37   | 152.51   | 154.70   |
| Otud1       | 2058.83  | 1969.37  | 925.77   | 849.24   |

|             |          |          |         |          |
|-------------|----------|----------|---------|----------|
| Dipk1a      | 1840.54  | 1909.31  | 840.97  | 732.90   |
| Zfp53       | 1419.54  | 1727.64  | 621.90  | 733.36   |
| Pdp1        | 462.78   | 487.88   | 199.66  | 204.37   |
| Il24        | 61.43    | 98.81    | 21.91   | 27.84    |
| Marveld2    | 811.13   | 812.47   | 365.15  | 350.24   |
| Serp2       | 48.45    | 62.65    | 13.42   | 9.59     |
| E430014B02F | 214.22   | 192.68   | 69.66   | 57.28    |
| Ehd4        | 2004.89  | 1856.53  | 900.80  | 766.05   |
| Add3        | 13119.63 | 10806.01 | 5829.38 | 4493.98  |
| Klf3        | 5709.44  | 5050.24  | 2653.50 | 2129.19  |
| Dgka        | 10159.94 | 9721.23  | 4760.68 | 4572.02  |
| Tmem64      | 2776.86  | 2436.13  | 1286.48 | 970.43   |
| Tub         | 47.21    | 45.60    | 14.38   | 7.65     |
| Rhoh        | 4727.60  | 4908.45  | 2215.80 | 2246.12  |
| Kif21b      | 21167.74 | 18876.36 | 9978.82 | 8196.54  |
| Fam221a     | 71.72    | 97.80    | 26.44   | 21.26    |
| Tnfrsf12a   | 206.77   | 216.94   | 84.50   | 67.59    |
| Lilra6      | 239.31   | 158.71   | 95.57   | 51.64    |
| Btnl2       | 625.75   | 649.41   | 290.56  | 295.67   |
| Retreg1     | 4461.72  | 4374.48  | 2112.89 | 2037.41  |
| Clcf1       | 5467.09  | 4659.27  | 2577.11 | 2012.42  |
| Trem12      | 7706.86  | 7176.45  | 3672.88 | 3486.40  |
| Fsip1       | 52.54    | 62.99    | 16.34   | 12.22    |
| Fam160a1    | 60.16    | 81.13    | 21.38   | 25.31    |
| Gm11342     | 56.68    | 43.52    | 16.08   | 8.08     |
| Fkbp11      | 93.11    | 89.41    | 34.65   | 17.67    |
| Gm9706      | 58.49    | 64.35    | 16.91   | 17.12    |
| Pgm2l1      | 980.48   | 857.64   | 452.92  | 357.98   |
| Ptk6        | 42.17    | 42.80    | 12.23   | 10.12    |
| Grap2       | 8423.23  | 7495.13  | 3903.66 | 3082.18  |
| Gucd1       | 3695.05  | 3420.15  | 1770.65 | 1405.04  |
| Apbb1       | 75.14    | 88.50    | 27.04   | 33.63    |
| Rasl10a     | 31.24    | 29.04    | 7.45    | 1.55     |
| Cerk        | 9869.19  | 9519.30  | 4772.85 | 4067.63  |
| Stat4       | 1527.20  | 1744.75  | 700.60  | 780.77   |
| Cgas        | 75.99    | 53.61    | 25.06   | 15.16    |
| St6gal1     | 8622.24  | 8915.17  | 4045.53 | 3708.63  |
| Btla        | 19098.77 | 23680.38 | 8868.69 | 10787.20 |
| Rph3al      | 301.18   | 285.03   | 137.61  | 121.95   |
| Rfx2        | 121.42   | 159.91   | 48.24   | 37.31    |
| Lmbrd1      | 5613.78  | 5518.59  | 2723.56 | 2374.01  |
| Gm47232     | 74.29    | 75.32    | 26.75   | 21.79    |
| Begain      | 165.90   | 160.58   | 74.30   | 68.41    |

| <b>Supp Table 2</b> |              |               |              |               |
|---------------------|--------------|---------------|--------------|---------------|
| <b>Gene</b>         | <b>WT FO</b> | <b>cKO FO</b> | <b>WT MZ</b> | <b>cKO MZ</b> |
| Zfp36l2             | 16631.20     | 11978.28      | 8539.57      | 3427.26       |
| Gm28935             | 30.81        | 48.12         | 9.85         | 5.10          |
| Gm36955             | 55.29        | 73.24         | 21.91        | 12.73         |
| Dipk2a              | 262.13       | 249.76        | 136.86       | 70.49         |
| Eya1                | 196.79       | 125.90        | 97.40        | 31.17         |
| Klf10               | 456.02       | 527.72        | 223.88       | 173.76        |
| Gfi1                | 354.93       | 460.66        | 197.89       | 154.53        |
| Ighv14-4            | 195.35       | 213.00        | 95.09        | 65.18         |
| Rtl5                | 70.01        | 74.36         | 29.81        | 20.69         |
| Igkv8-21            | 355.55       | 287.54        | 176.66       | 107.05        |
| Vat1                | 478.15       | 493.71        | 235.43       | 188.01        |
| Dusp10              | 580.78       | 509.23        | 328.44       | 172.49        |
| Calcr1              | 451.19       | 437.02        | 241.28       | 161.06        |
| Thbd                | 43.67        | 55.84         | 25.14        | 14.18         |
| Arc                 | 72.26        | 83.04         | 36.38        | 24.88         |
| 9030404E10Rik       | 67.12        | 58.85         | 22.56        | 11.07         |
| Cd209a              | 31.43        | 32.06         | 8.72         | 1.99          |
| Cacna1d             | 333.31       | 275.55        | 170.65       | 104.71        |
| Gabrb1              | 19.23        | 42.98         | 9.46         | 6.12          |
| Slc26a11            | 1076.18      | 1173.84       | 527.20       | 479.30        |
| Ii21r               | 8104.14      | 6061.95       | 4006.79      | 2557.93       |
| Hlx                 | 73.83        | 90.77         | 37.89        | 28.34         |
| Plpp2               | 128.31       | 116.94        | 68.49        | 40.23         |
| Dusp4               | 1346.33      | 2116.74       | 364.24       | 412.42        |
| Spred2              | 199.39       | 189.62        | 86.09        | 63.98         |
| Ighv8-6             | 17.38        | 33.62         | 5.58         | 4.61          |
| Orm2                | 70.94        | 75.66         | 27.49        | 18.22         |
| Pold1               | 5565.73      | 8136.02       | 2812.52      | 3480.47       |
| Trim25              | 11110.55     | 9058.02       | 5359.01      | 3705.25       |
| Rnf125              | 86.38        | 85.81         | 20.51        | 5.57          |
| Gm49105             | 598.65       | 599.97        | 294.73       | 248.00        |
| Lpp                 | 2315.21      | 1914.09       | 1107.71      | 793.18        |
| Gm50107             | 117.74       | 127.25        | 59.97        | 44.51         |
| Igkv4-61            | 48.73        | 58.92         | 38.08        | 17.70         |
| Shisa8              | 167.09       | 199.09        | 93.96        | 64.02         |
| Rap1b               | 12257.71     | 12415.47      | 5906.56      | 5272.09       |
| Rasa4               | 710.64       | 933.86        | 349.39       | 401.89        |
| Kcnh4               | 89.04        | 89.13         | 37.29        | 25.09         |
| Acsl3               | 591.95       | 617.32        | 294.65       | 263.11        |
| Papln               | 24.60        | 36.48         | 12.74        | 5.62          |
| Trip10              | 285.28       | 259.00        | 134.16       | 106.10        |
| Gm48591             | 25.69        | 36.21         | 6.48         | 4.09          |

|               |          |          |         |         |
|---------------|----------|----------|---------|---------|
| B4galnt2      | 53.85    | 50.14    | 19.03   | 13.63   |
| Tagln2        | 3174.17  | 3300.99  | 1563.42 | 1386.46 |
| Afap1         | 210.34   | 259.05   | 114.15  | 104.57  |
| Ckap4         | 946.25   | 852.45   | 467.13  | 364.96  |
| A3galt2       | 81.74    | 81.86    | 33.49   | 27.86   |
| Aff3          | 5203.11  | 5051.79  | 2733.25 | 2216.78 |
| Cd2           | 5854.94  | 5614.87  | 3251.40 | 2493.45 |
| Rps6ka5       | 1722.17  | 1892.57  | 917.18  | 838.04  |
| Brpf3         | 2603.32  | 2599.54  | 1279.85 | 1152.22 |
| Ms4a4c        | 4730.68  | 4927.82  | 2079.12 | 1672.50 |
| BC049352      | 302.42   | 310.29   | 148.30  | 112.63  |
| Gm20559       | 4848.04  | 4536.93  | 2387.95 | 2009.14 |
| Gpd1l         | 6990.70  | 7611.97  | 3482.68 | 3440.69 |
| Gfod1         | 539.39   | 413.34   | 165.82  | 63.09   |
| Gna15         | 406.48   | 490.42   | 214.76  | 212.93  |
| Fxyd5         | 1887.35  | 2004.69  | 935.22  | 903.99  |
| Cd83          | 11691.11 | 13676.48 | 6360.98 | 4985.05 |
| Tbx6          | 384.80   | 327.44   | 182.20  | 141.18  |
| Mtss1         | 6334.50  | 5628.23  | 3526.00 | 2582.06 |
| Pisd-ps1      | 1768.54  | 1533.28  | 1075.34 | 694.56  |
| Hspa4l        | 838.67   | 892.71   | 395.88  | 248.72  |
| Mef2c         | 15906.81 | 14224.79 | 8123.50 | 6559.91 |
| Gm35019       | 2.47     | 30.12    | 0.93    | 0.50    |
| Mfsd6         | 317.02   | 380.75   | 179.09  | 169.50  |
| Nav2          | 39.53    | 69.27    | 24.78   | 24.33   |
| Tspan18       | 13.33    | 30.16    | 4.67    | 4.55    |
| Rictor        | 4537.48  | 4355.04  | 2354.05 | 2000.15 |
| Ier5l         | 126.70   | 132.55   | 57.25   | 51.44   |
| Ms4a4a        | 75.11    | 78.44    | 28.89   | 25.28   |
| Ccm2          | 5983.75  | 5235.64  | 3086.45 | 2440.59 |
| Chrna2        | 209.93   | 245.91   | 92.12   | 99.14   |
| Cyp2d22       | 250.69   | 274.60   | 119.29  | 120.80  |
| Tec           | 4446.37  | 4395.25  | 2436.90 | 2006.21 |
| Lrrc8a        | 284.95   | 328.56   | 139.30  | 146.80  |
| Cdkl5         | 156.90   | 142.69   | 90.03   | 58.36   |
| Fer1l5        | 193.52   | 255.48   | 125.93  | 94.38   |
| Prr18         | 24.08    | 32.84    | 5.55    | 7.11    |
| Cecr2         | 1019.59  | 826.47   | 531.84  | 347.00  |
| Rab6b         | 238.36   | 275.65   | 116.71  | 121.04  |
| Gm7707        | 13.36    | 24.68    | 18.37   | 1.01    |
| Plekho1       | 5253.39  | 5261.01  | 2793.89 | 2493.16 |
| Chst15        | 3582.53  | 3609.57  | 1989.28 | 1700.80 |
| A430088P11Rik | 39.25    | 61.48    | 16.22   | 20.23   |
| Tnks1bp1      | 1280.63  | 1225.27  | 721.26  | 572.03  |



|          |          |          |         |         |
|----------|----------|----------|---------|---------|
| Fgd3     | 6465.39  | 6115.49  | 3474.99 | 2872.35 |
| Ndnf     | 30.62    | 34.29    | 9.34    | 8.13    |
| Gm37176  | 130.20   | 113.66   | 56.91   | 44.53   |
| Atp6v0a1 | 3228.93  | 3367.74  | 1757.62 | 1524.73 |
| Gm20627  | 17.59    | 30.83    | 5.58    | 6.53    |
| Tmem65   | 305.12   | 328.50   | 169.68  | 149.92  |
| Klra1    | 31.93    | 28.03    | 7.36    | 5.04    |
| Lsp1     | 18122.40 | 17906.91 | 9879.47 | 8669.80 |
| Gm30948  | 15.86    | 23.39    | 0.45    | 1.50    |
| Gm37593  | 94.52    | 91.27    | 38.56   | 35.49   |
| Rgs13    | 64.79    | 74.40    | 24.23   | 18.35   |
| Ighv1-36 | 42.20    | 71.72    | 28.74   | 24.20   |
| Cnn3     | 3528.57  | 3435.14  | 1754.89 | 1651.51 |
| Kif19a   | 206.10   | 171.93   | 103.15  | 76.96   |
| Reck     | 26.14    | 34.69    | 8.86    | 6.15    |
| Rara     | 2533.56  | 2599.46  | 1277.52 | 1256.60 |
| Dennd5b  | 4248.45  | 3444.06  | 2093.19 | 1634.71 |
| Cplx2    | 68.80    | 91.80    | 44.02   | 33.55   |
| Lasp1    | 2955.84  | 2805.01  | 1581.89 | 1378.37 |

**Supp Table 3**

| <b>Gene</b>   | <b>WT FO</b> | <b>cKO FO</b> | <b>WT MZ</b> | <b>cKO MZ</b> |
|---------------|--------------|---------------|--------------|---------------|
| I830077J02Rik | 56.87        | 44.20         | 3562.91      | 5070.75       |
| Asb2          | 47.84        | 33.45         | 2503.44      | 2433.18       |
| Gpr156        | 10.18        | 2.18          | 772.65       | 781.21        |
| Ackr3         | 43.72        | 42.92         | 2501.07      | 3113.03       |
| Adam28        | 9.79         | 5.20          | 668.52       | 652.74        |
| Tsga13        | 11.72        | 7.94          | 794.39       | 869.39        |
| S1pr3         | 241.93       | 198.18        | 7570.85      | 8085.39       |
| Neb1          | 93.26        | 111.17        | 2850.30      | 3608.07       |
| Plxnd1        | 235.96       | 233.44        | 6288.00      | 7490.84       |
| Rgs10         | 55.42        | 47.89         | 1515.88      | 1277.12       |
| Tbc1d9        | 89.31        | 150.56        | 2358.74      | 3373.35       |
| Rxfp1         | 11.72        | 9.06          | 481.11       | 393.37        |
| Pla2g7        | 26.13        | 25.51         | 830.30       | 801.95        |
| Ceacam2       | 14.10        | 13.66         | 590.13       | 640.31        |
| Rap1gap       | 87.64        | 72.57         | 2224.96      | 1517.64       |
| Ackr2         | 53.59        | 52.82         | 1678.37      | 2102.60       |
| Ffar2         | 53.42        | 55.04         | 1374.25      | 1656.27       |
| Gm2065        | 8.77         | 7.05          | 350.09       | 312.03        |
| Rec8          | 18.11        | 35.93         | 610.50       | 629.55        |
| Trpm2         | 54.44        | 59.37         | 1337.95      | 1674.55       |
| Nrp2          | 31.32        | 29.77         | 835.11       | 1080.36       |
| Myof          | 613.99       | 579.07        | 11868.65     | 9884.74       |
| Zfp532        | 2.92         | 5.49          | 271.65       | 313.01        |
| Tmod2         | 5.26         | 3.25          | 262.34       | 188.38        |
| Serpine2      | 9.82         | 10.91         | 407.98       | 372.59        |
| Cd9           | 92.97        | 79.56         | 1582.65      | 1452.13       |
| Srgap3        | 30.43        | 12.53         | 711.95       | 406.48        |
| Zc3h12c       | 277.18       | 295.04        | 4118.69      | 3548.02       |
| Grip2         | 7.75         | 11.42         | 314.33       | 309.40        |
| Ms4a14        | 3.83         | 7.00          | 209.19       | 136.30        |
| Sema7a        | 506.98       | 440.76        | 7191.19      | 4766.05       |
| Sorbs2        | 19.49        | 18.24         | 456.55       | 392.54        |
| Il10          | 11.72        | 15.50         | 282.12       | 265.34        |
| AW011738      | 159.08       | 124.84        | 2149.72      | 2184.74       |
| Ube2e2        | 0.97         | 1.12          | 135.92       | 200.21        |
| Gm4956        | 6.32         | 6.94          | 182.40       | 148.22        |
| Lipc          | 30.53        | 16.06         | 543.74       | 361.78        |
| Ms4a7         | 8.32         | 10.52         | 263.63       | 237.28        |
| Myo18b        | 1.93         | 1.12          | 139.09       | 162.07        |
| Ldlrad3       | 78.67        | 82.08         | 1076.94      | 909.77        |
| Fcrl5         | 516.84       | 463.80        | 6390.63      | 6834.72       |
| Cd300lf       | 132.38       | 116.09        | 1762.66      | 1726.80       |

|               |         |         |          |          |
|---------------|---------|---------|----------|----------|
| Grk3          | 180.44  | 201.08  | 2070.98  | 2077.80  |
| Atxn1         | 212.61  | 219.89  | 2352.96  | 2181.03  |
| Lair1         | 46.19   | 43.92   | 530.38   | 728.27   |
| Cdh17         | 209.35  | 201.76  | 2105.17  | 2347.27  |
| Tlr3          | 131.59  | 117.16  | 1294.18  | 1072.16  |
| Smyd2         | 13.17   | 23.28   | 214.97   | 296.62   |
| Rundc3b       | 24.55   | 13.32   | 374.43   | 343.98   |
| Cdc42bpb      | 140.82  | 192.82  | 1434.17  | 1560.33  |
| Alpl          | 59.23   | 56.12   | 737.68   | 721.79   |
| Ptpn14        | 533.26  | 327.41  | 4907.51  | 4095.29  |
| Csf2rb        | 321.22  | 279.89  | 3036.63  | 2601.74  |
| Pde4a         | 348.69  | 338.19  | 3011.62  | 1962.51  |
| Cd36          | 749.78  | 635.11  | 5785.48  | 4965.26  |
| Dse           | 40.01   | 27.87   | 377.65   | 197.82   |
| Mfhas1        | 664.40  | 481.31  | 4845.20  | 3412.53  |
| 1700071M16Rik | 1.00    | 2.18    | 72.34    | 61.52    |
| Stc1          | 1.00    | 2.18    | 65.15    | 108.16   |
| Gm43916       | 5.33    | 7.22    | 177.02   | 132.38   |
| Gm16793       | 2.47    | 2.13    | 87.06    | 66.90    |
| Tspan15       | 25.60   | 11.92   | 1939.25  | 1589.32  |
| 9630028I04Rik | 41.27   | 45.93   | 374.13   | 425.90   |
| Tnfrsf21      | 80.51   | 97.14   | 678.53   | 631.87   |
| Nlrp1b        | 8.75    | 13.82   | 118.63   | 171.92   |
| Zfyve28       | 59.53   | 52.31   | 484.12   | 490.53   |
| Ptafr         | 9.25    | 1.12    | 135.11   | 70.25    |
| Sel1l3        | 8.77    | 4.25    | 123.08   | 56.38    |
| Drd5          | 1.50    | 0.56    | 117.01   | 71.37    |
| Gm15513       | 43.06   | 37.09   | 366.54   | 394.88   |
| Lilrb4a       | 114.09  | 120.43  | 999.85   | 972.77   |
| Nedd4         | 1246.76 | 1446.03 | 8128.17  | 8879.16  |
| Dph5          | 734.99  | 753.75  | 4639.04  | 4882.63  |
| Oosp1         | 10.20   | 10.01   | 121.15   | 122.98   |
| Slit3         | 3.90    | 1.12    | 83.27    | 61.82    |
| Dyrk4         | 9.34    | 18.35   | 118.62   | 188.64   |
| Sema6b        | 35.97   | 116.77  | 289.85   | 691.13   |
| Slc39a4       | 23.39   | 22.94   | 196.18   | 224.46   |
| Cd59a         | 4.37    | 10.40   | 76.93    | 196.67   |
| Cacnb4        | 24.46   | 10.01   | 212.32   | 97.94    |
| Stom          | 115.98  | 101.50  | 761.44   | 662.62   |
| Cd1d1         | 1034.37 | 1101.67 | 6329.27  | 8019.74  |
| Pdia4         | 4925.05 | 5055.92 | 28704.75 | 28764.13 |
| Gml           | 4.40    | 2.57    | 81.29    | 58.40    |
| Sirpa         | 163.30  | 119.13  | 1139.70  | 924.20   |
| 5730409E04Rik | 3.92    | 8.95    | 76.62    | 122.15   |

|               |         |         |          |          |
|---------------|---------|---------|----------|----------|
| Vash2         | 4.37    | 5.88    | 79.13    | 137.89   |
| Cyp39a1       | 252.33  | 221.09  | 1591.24  | 1292.31  |
| Marcks        | 1364.13 | 1140.41 | 7620.71  | 6450.34  |
| Mzb1          | 156.07  | 181.51  | 960.52   | 918.89   |
| Dzip1         | 9.77    | 24.45   | 110.29   | 131.59   |
| Gdpd5         | 15.62   | 22.21   | 140.19   | 133.87   |
| Lrrc25        | 57.04   | 42.80   | 425.64   | 369.71   |
| Gpr55         | 48.29   | 18.80   | 406.25   | 228.87   |
| Abcb1a        | 39.38   | 20.04   | 900.30   | 587.96   |
| Ppl           | 99.00   | 124.19  | 1494.17  | 1611.81  |
| Igkv2-107     | 20.87   | 11.53   | 202.79   | 113.54   |
| Coro2b        | 8.16    | 2.57    | 115.68   | 76.82    |
| Cyp8b1        | 1.00    | 4.14    | 53.31    | 52.19    |
| Trim30c       | 68.97   | 47.28   | 414.99   | 280.07   |
| Galm          | 6.80    | 5.20    | 83.44    | 73.47    |
| Cln8          | 22.60   | 16.51   | 230.02   | 119.51   |
| Fam149a       | 4.92    | 1.12    | 84.30    | 63.26    |
| Gm12503       | 7.23    | 6.05    | 98.30    | 85.96    |
| Plau          | 7.91    | 12.20   | 196.59   | 172.66   |
| Kcnk13        | 30.05   | 23.16   | 223.27   | 198.01   |
| Dtx1          | 4656.89 | 4986.58 | 24720.93 | 25031.32 |
| Guca2b        | 1.47    | 4.31    | 57.11    | 35.06    |
| Trem1         | 31.99   | 45.55   | 233.13   | 336.21   |
| Lysmd2        | 25.75   | 17.57   | 177.46   | 168.31   |
| Hbegf         | 2.45    | 3.86    | 57.90    | 73.54    |
| Hmgn3         | 134.16  | 107.87  | 708.83   | 645.29   |
| Ntng2         | 38.78   | 82.96   | 283.48   | 433.84   |
| A930005H10Rik | 119.54  | 98.64   | 642.48   | 664.24   |
| Dok2          | 33.59   | 41.97   | 218.75   | 210.48   |
| Neb           | 36.13   | 16.73   | 224.63   | 178.09   |
| 5033430I15Rik | 5.44    | 6.27    | 74.94    | 85.53    |
| Gm42372       | 13.17   | 16.28   | 104.79   | 98.92    |
| Gm4610        | 189.91  | 169.18  | 980.95   | 1097.10  |
| Slc22a3       | 1.47    | 3.92    | 77.51    | 46.78    |
| Grn           | 960.92  | 807.68  | 4508.69  | 3928.06  |
| Tns1          | 18.97   | 8.06    | 153.18   | 96.96    |
| Nhs           | 16.59   | 32.39   | 119.28   | 164.12   |
| Cdon          | 323.82  | 311.49  | 1536.37  | 1723.31  |
| Cfp           | 574.16  | 680.97  | 2752.76  | 3548.62  |
| Grm6          | 72.55   | 85.78   | 371.78   | 348.15   |
| Ttc8          | 9.79    | 18.91   | 84.89    | 102.96   |
| Myo6          | 58.82   | 46.66   | 292.53   | 332.04   |
| Gm32834       | 0.97    | 1.00    | 43.71    | 44.53    |
| Prf1          | 65.79   | 51.87   | 354.58   | 363.90   |

|          |         |         |          |          |
|----------|---------|---------|----------|----------|
| Ryk      | 8.23    | 8.11    | 79.79    | 85.89    |
| Bst1     | 22.16   | 19.69   | 169.09   | 299.37   |
| Gm45867  | 203.99  | 176.81  | 952.85   | 717.40   |
| Gm37422  | 8.77    | 6.10    | 91.63    | 127.86   |
| Terb1    | 167.98  | 128.33  | 803.96   | 770.07   |
| Adamdec1 | 9.68    | 10.69   | 81.89    | 96.10    |
| Cd1d2    | 9.75    | 8.22    | 84.12    | 138.08   |
| Agrn     | 202.69  | 164.72  | 918.06   | 892.27   |
| Dusp16   | 989.28  | 927.01  | 4824.48  | 4271.18  |
| Plac8    | 4818.04 | 6232.70 | 20282.58 | 20831.89 |
| Slc22a17 | 44.41   | 59.53   | 230.30   | 277.71   |
| Cfap126  | 12.10   | 11.58   | 90.21    | 77.01    |
| Nod2     | 87.62   | 77.44   | 418.79   | 310.67   |
| Cish     | 8.32    | 14.44   | 86.00    | 55.06    |
| Meis3    | 121.08  | 124.95  | 587.29   | 482.35   |
| Vwa5a    | 170.50  | 181.45  | 803.05   | 884.79   |
| Mpeg1    | 690.13  | 603.02  | 4760.20  | 4544.16  |
| Spag5    | 55.75   | 50.30   | 369.71   | 306.46   |
| Sla2     | 31.62   | 23.67   | 177.05   | 109.07   |
| Eppk1    | 42.41   | 31.94   | 208.47   | 188.54   |
| Ahr      | 294.70  | 219.91  | 1367.48  | 1317.46  |
| Epm2a    | 11.74   | 15.33   | 82.02    | 93.76    |
| Npr2     | 9.72    | 3.81    | 85.67    | 62.59    |
| Gm11707  | 22.87   | 33.28   | 136.71   | 139.90   |
| Jph1     | 2.42    | 3.25    | 46.10    | 62.83    |
| Dkk1     | 19.85   | 21.82   | 127.13   | 146.09   |
| Tm6sf1   | 2165.06 | 1946.66 | 8617.21  | 7431.73  |
| Alpk2    | 115.52  | 92.94   | 522.96   | 449.41   |
| Dtx4     | 177.73  | 200.80  | 729.02   | 713.60   |
| Aldh5a1  | 3.92    | 3.64    | 49.64    | 62.35    |
| Slc6a13  | 4.35    | 6.94    | 49.04    | 79.02    |
| Akr1e1   | 41.20   | 51.70   | 198.79   | 219.13   |
| Txlnb    | 4.37    | 3.64    | 53.32    | 39.94    |
| Pclaf    | 52.95   | 33.40   | 363.88   | 340.02   |
| Il9r     | 3692.93 | 4416.20 | 14469.04 | 20323.21 |
| Rsu1     | 657.46  | 748.34  | 2607.60  | 3734.39  |
| Ccr1     | 50.05   | 32.50   | 643.37   | 757.88   |
| Bub1     | 27.44   | 18.75   | 209.18   | 158.43   |
| Adamts13 | 0.95    | 3.08    | 38.17    | 54.73    |
| Bfsp1    | 4.87    | 2.13    | 51.76    | 41.54    |
| Gbp8     | 146.80  | 117.04  | 596.10   | 514.41   |
| Kntc1    | 38.61   | 23.67   | 258.23   | 255.88   |
| Espl1    | 39.04   | 26.58   | 282.49   | 208.06   |
| Id2      | 220.41  | 185.78  | 909.14   | 699.78   |

|               |          |          |          |          |
|---------------|----------|----------|----------|----------|
| Pik3r4        | 3356.40  | 2977.81  | 17530.46 | 15237.65 |
| Chrm3         | 0.50     | 0.50     | 34.68    | 59.27    |
| Endod1        | 388.94   | 354.20   | 1467.81  | 980.23   |
| P4htm         | 39.22    | 47.00    | 185.52   | 156.94   |
| Asap2         | 167.50   | 141.06   | 640.11   | 562.27   |
| Gm5547        | 29.40    | 18.52    | 144.60   | 135.50   |
| Rhobtb1       | 7.68     | 10.74    | 80.68    | 58.67    |
| Camkmt        | 127.94   | 93.89    | 506.44   | 522.72   |
| Pmepa1        | 77.94    | 52.22    | 400.58   | 287.44   |
| Zap70         | 55.58    | 31.89    | 265.52   | 139.99   |
| Kif18b        | 18.31    | 8.56     | 153.12   | 115.64   |
| Slc9a9        | 56.37    | 32.62    | 234.32   | 183.61   |
| Ly96          | 68.40    | 63.28    | 278.27   | 241.45   |
| Rhbdf1        | 672.33   | 1015.96  | 2545.91  | 3738.96  |
| Mybl2         | 60.62    | 53.65    | 257.14   | 282.02   |
| Tpst2         | 1342.28  | 1653.35  | 5191.04  | 4781.05  |
| AF067061      | 6.71     | 5.26     | 72.56    | 34.35    |
| Emb           | 92.54    | 93.24    | 409.50   | 495.67   |
| Plcd3         | 17.88    | 10.86    | 638.52   | 330.00   |
| Cr2           | 25346.33 | 24148.84 | 88341.18 | 92019.62 |
| Akap1         | 17.02    | 14.71    | 90.66    | 111.46   |
| Hs3st3b1      | 89.78    | 85.11    | 356.06   | 295.94   |
| Inpp4a        | 594.48   | 721.46   | 2130.76  | 1663.45  |
| Ell3          | 65.08    | 77.55    | 263.53   | 262.78   |
| Dglucy        | 239.70   | 280.04   | 862.77   | 963.04   |
| Gm36936       | 21.16    | 21.65    | 132.57   | 113.63   |
| Cdca5         | 28.17    | 29.16    | 165.39   | 162.24   |
| Tubg2         | 66.31    | 62.38    | 277.99   | 237.95   |
| Jaml          | 169.00   | 149.45   | 624.00   | 504.75   |
| Lurap1        | 102.07   | 86.94    | 410.08   | 443.12   |
| Gm22748       | 39.81    | 68.32    | 181.67   | 191.91   |
| Epcam         | 83.86    | 113.81   | 344.38   | 289.69   |
| Crebl2        | 1030.78  | 1038.03  | 3573.83  | 3626.24  |
| Clspn         | 37.23    | 37.10    | 235.98   | 208.66   |
| 5830418P13Rik | 72.98    | 47.50    | 281.13   | 295.41   |
| Fam241b       | 1.00     | 2.57     | 34.66    | 41.09    |
| Mlkl          | 7.30     | 9.57     | 56.17    | 51.80    |
| Disc1         | 12.19    | 10.29    | 80.25    | 97.58    |
| Afdn          | 23.44    | 15.05    | 112.41   | 113.63   |
| Pde8a         | 335.74   | 364.03   | 1268.06  | 1262.01  |
| Kifc3         | 13.01    | 14.71    | 80.90    | 77.16    |
| Ccna2         | 60.42    | 39.17    | 351.11   | 318.52   |
| Slc39a11      | 93.83    | 142.40   | 342.38   | 369.14   |
| Abcb1b        | 97.78    | 83.71    | 363.26   | 328.48   |

|               |         |         |         |         |
|---------------|---------|---------|---------|---------|
| E2f8          | 23.63   | 14.71   | 137.61  | 117.06  |
| Mgst1         | 43.88   | 48.68   | 183.86  | 219.93  |
| Cenpf         | 47.11   | 24.68   | 281.87  | 243.58  |
| Tmtc4         | 144.52  | 158.70  | 566.66  | 578.83  |
| Hdgfl3        | 243.93  | 230.70  | 846.59  | 883.37  |
| Mcm10         | 30.39   | 17.74   | 184.55  | 190.15  |
| Gm31499       | 1.93    | 1.01    | 38.37   | 43.86   |
| 4930568A12Rik | 18.90   | 21.87   | 95.95   | 114.04  |
| Ldhd          | 9.77    | 17.96   | 61.99   | 73.86   |
| Derl3         | 101.64  | 109.26  | 427.36  | 440.23  |
| Dnase1l3      | 125.43  | 73.35   | 1020.76 | 668.77  |
| Mvb12b        | 17.43   | 24.56   | 91.71   | 100.10  |
| Gm42047       | 137.69  | 67.53   | 485.45  | 297.68  |
| Osgin1        | 102.00  | 152.29  | 441.54  | 517.40  |
| lqgap3        | 11.13   | 6.83    | 96.95   | 79.93   |
| Gm38244       | 14.96   | 12.42   | 94.64   | 97.16   |
| Itm2c         | 247.94  | 303.49  | 893.67  | 834.63  |
| Perm1         | 90.85   | 82.31   | 322.99  | 368.12  |
| Hes5          | 42.29   | 26.13   | 191.57  | 117.13  |
| Mocos         | 4.40    | 2.07    | 44.23   | 42.50   |
| Tpx2          | 64.76   | 40.62   | 308.31  | 247.53  |
| Fam92a        | 55.89   | 41.01   | 211.95  | 234.16  |
| Pde4d         | 235.90  | 271.95  | 2059.20 | 1836.40 |
| Insrr         | 0.48    | 3.02    | 42.08   | 35.93   |
| Ube2c         | 20.30   | 12.64   | 142.25  | 119.49  |
| Carmil1       | 1074.00 | 1083.12 | 3471.79 | 3459.07 |
| Rbm47         | 23.35   | 20.59   | 114.54  | 88.00   |
| Gpx7          | 11.70   | 22.21   | 63.85   | 65.37   |
| Mfsd4b4       | 90.08   | 94.05   | 323.17  | 376.82  |
| lsg15         | 150.16  | 113.80  | 527.42  | 392.05  |
| Dtl           | 68.39   | 78.40   | 304.05  | 358.77  |
| Cul9          | 434.97  | 514.00  | 1424.51 | 1566.33 |
| Esco2         | 24.13   | 13.71   | 148.16  | 132.86  |
| Birc5         | 35.69   | 24.34   | 207.19  | 186.03  |
| P2ry12        | 4.35    | 7.00    | 44.90   | 37.43   |
| Smco4         | 27.99   | 18.30   | 128.84  | 126.74  |
| Stil          | 28.15   | 16.67   | 159.91  | 115.41  |
| Aox4          | 7.27    | 2.07    | 50.74   | 43.12   |
| 2010300C02Rik | 1.45    | 3.25    | 33.13   | 41.33   |
| Klf5          | 2.92    | 3.25    | 39.08   | 34.85   |
| Gm37780       | 84.78   | 91.04   | 372.90  | 605.02  |
| Gm43990       | 6.25    | 8.06    | 49.72   | 58.15   |
| Per3          | 235.19  | 253.39  | 769.62  | 868.18  |
| Csf2rb2       | 15.03   | 8.56    | 85.29   | 68.79   |

|         |         |         |         |         |
|---------|---------|---------|---------|---------|
| Dctd    | 40.82   | 47.51   | 158.36  | 193.95  |
| Rnf43   | 87.16   | 86.95   | 332.91  | 289.85  |
| Scd2    | 1988.45 | 2051.37 | 6298.09 | 6086.62 |
| Cd80    | 36.40   | 29.82   | 159.24  | 121.83  |
| Bzw2    | 657.85  | 653.62  | 2043.82 | 2214.35 |
| Fgl2    | 27.80   | 16.45   | 150.90  | 137.89  |
| Trabd2b | 8.30    | 16.40   | 69.09   | 65.47   |
| Tjp2    | 60.60   | 85.49   | 226.10  | 256.30  |
| Ltk     | 506.00  | 375.82  | 1557.18 | 1270.94 |
| Tlcd2   | 28.15   | 32.84   | 113.48  | 99.40   |
| Wwc1    | 3.42    | 3.75    | 36.05   | 32.39   |
| Gm35419 | 1.00    | 0.56    | 29.45   | 28.05   |
| Col15a1 | 0.50    | 1.51    | 29.48   | 29.46   |
| Gpm6b   | 61.65   | 57.80   | 230.01  | 261.80  |
| Mical3  | 475.18  | 538.70  | 1443.41 | 1614.93 |
| Adam3   | 1.47    | 2.01    | 32.45   | 44.60   |
| Hck     | 2503.43 | 2250.54 | 7571.84 | 6907.07 |
| Mcoln3  | 260.37  | 118.14  | 917.05  | 535.97  |
| Isoc2b  | 52.28   | 77.70   | 199.76  | 225.74  |
| Cdca3   | 74.56   | 62.55   | 307.02  | 246.19  |
| Shcbp1  | 23.73   | 12.25   | 127.62  | 111.22  |
| Mfsd2a  | 13.24   | 23.39   | 67.20   | 96.32   |
| Raph1   | 11.06   | 6.88    | 68.99   | 52.28   |
| Hmmr    | 23.59   | 15.27   | 153.71  | 115.48  |
| Heyl    | 1.45    | 1.01    | 32.14   | 34.15   |
| Cdca2   | 63.28   | 60.43   | 235.02  | 171.99  |
| Ikake   | 627.32  | 625.03  | 1884.28 | 1751.89 |
| Ypel2   | 322.75  | 193.65  | 1028.11 | 609.99  |
| Nuf2    | 18.31   | 16.90   | 123.14  | 111.62  |
| Mir704  | 12.72   | 14.83   | 63.37   | 63.19   |
| Azin2   | 2.47    | 2.07    | 32.28   | 45.01   |
| Abr     | 1098.41 | 1182.51 | 3340.30 | 3202.67 |
| Prdm1   | 114.87  | 107.44  | 436.59  | 336.26  |
| Nbl1    | 3.95    | 2.52    | 40.72   | 50.64   |
| Cdk1    | 44.60   | 33.90   | 222.39  | 210.09  |
| Crim1   | 164.83  | 344.33  | 510.68  | 737.14  |
| Tbx19   | 1.95    | 0.56    | 31.71   | 33.63   |
| Ttk     | 19.28   | 18.52   | 99.31   | 63.60   |
| Plscr1  | 107.38  | 88.70   | 347.96  | 362.14  |
| Akr7a5  | 480.52  | 512.25  | 1453.08 | 1223.96 |
| Ephx2   | 1.47    | 3.69    | 29.31   | 61.16   |
| Bid     | 1383.02 | 1230.30 | 4059.46 | 3821.72 |
| Tcf19   | 73.06   | 62.94   | 294.14  | 270.41  |
| Smad3   | 1011.58 | 975.90  | 3020.89 | 2928.70 |



|               |         |        |         |         |
|---------------|---------|--------|---------|---------|
| Gm22720       | 7.80    | 3.58   | 58.14   | 74.93   |
| Tyms          | 59.93   | 72.18  | 210.44  | 211.58  |
| Matk          | 404.94  | 471.36 | 1182.19 | 1414.84 |
| BC030867      | 5.30    | 4.76   | 46.99   | 44.92   |
| Cdh5          | 18.57   | 19.58  | 83.17   | 80.62   |
| 6530402F18Rik | 97.94   | 164.49 | 311.96  | 426.85  |
| Nme4          | 12.60   | 15.39  | 58.50   | 115.78  |
| Kif13a        | 123.72  | 195.99 | 382.62  | 500.55  |
| Myl4          | 317.79  | 342.88 | 950.54  | 1063.43 |
| Slc6a21       | 10.18   | 12.70  | 52.81   | 48.15   |
| Tfpi          | 49.68   | 51.81  | 166.15  | 150.77  |
| 1700048O20Rik | 85.22   | 61.09  | 267.10  | 378.76  |
| Naip5         | 410.18  | 419.32 | 1237.00 | 1123.76 |
| Uhrf1         | 238.72  | 189.84 | 770.72  | 653.17  |
| Poglut2       | 73.32   | 103.95 | 232.32  | 261.44  |
| Tet1          | 80.67   | 60.66  | 281.03  | 296.34  |
| Cdk5r1        | 334.29  | 361.62 | 960.59  | 964.85  |
| Stxbp1        | 73.82   | 80.96  | 233.14  | 276.61  |
| Pla2g4a       | 20.37   | 21.37  | 85.19   | 114.83  |
| Scamp1        | 5.82    | 6.10   | 46.86   | 50.63   |
| Gm17999       | 1.00    | 2.69   | 25.29   | 37.96   |
| Bcl2l15       | 0.97    | 3.08   | 27.43   | 26.79   |
| Nusap1        | 96.49   | 72.06  | 391.05  | 351.72  |
| Odaph         | 6.82    | 12.20  | 41.36   | 60.48   |
| Nlrx1         | 57.20   | 83.70  | 185.48  | 244.70  |
| Ankle1        | 12.46   | 11.02  | 108.17  | 93.24   |
| Zfp239        | 99.67   | 102.59 | 336.38  | 413.65  |
| Ly6k          | 46.85   | 62.01  | 177.02  | 214.87  |
| Rrm2          | 120.94  | 102.44 | 457.27  | 469.92  |
| Dnaja4        | 8.44    | 7.16   | 79.18   | 114.47  |
| 9430041J12Rik | 0.95    | 1.00   | 27.38   | 29.90   |
| Chil6         | 0.48    | 1.00   | 24.89   | 30.45   |
| Lmbr1         | 21.30   | 22.44  | 85.29   | 78.95   |
| Rgmb          | 90.40   | 97.81  | 273.09  | 277.37  |
| Gng7          | 3.40    | 1.68   | 31.68   | 47.62   |
| C030013C21Rik | 8.27    | 9.06   | 45.62   | 61.39   |
| Pqlc2         | 664.63  | 608.69 | 1826.83 | 1563.34 |
| Mettl21a      | 115.35  | 93.66  | 335.63  | 324.66  |
| Zfp976        | 31.73   | 33.74  | 116.24  | 142.55  |
| Tmem151b      | 31.03   | 24.68  | 112.40  | 113.47  |
| Slc29a3       | 1062.94 | 921.22 | 2910.89 | 2522.60 |
| Tfdp1         | 302.65  | 302.22 | 889.98  | 922.60  |
| Chn2          | 14.05   | 9.18   | 66.28   | 71.82   |
| Cdh23         | 5.35    | 6.44   | 39.98   | 28.54   |

|               |         |          |          |          |
|---------------|---------|----------|----------|----------|
| Tmem231       | 61.67   | 60.54    | 189.76   | 226.40   |
| Zfp442        | 8.84    | 11.25    | 48.39    | 40.06    |
| Gm40634       | 18.92   | 22.16    | 77.77    | 76.49    |
| Tmeff1        | 9.29    | 13.04    | 51.87    | 56.44    |
| Melk          | 14.46   | 9.40     | 86.48    | 61.92    |
| Myc           | 6752.05 | 10081.41 | 24389.19 | 26413.79 |
| Plxnc1        | 2779.47 | 2709.26  | 7459.99  | 6708.34  |
| Zfp612        | 27.86   | 33.74    | 96.27    | 135.40   |
| Slc4a8        | 391.57  | 392.40   | 1102.12  | 1104.55  |
| Lacc1         | 186.48  | 222.39   | 526.40   | 728.36   |
| Pbk           | 9.61    | 8.34     | 71.56    | 60.04    |
| Ckap2l        | 40.27   | 30.05    | 170.68   | 158.36   |
| Gm26560       | 1.97    | 0.50     | 29.59    | 17.19    |
| Mirt1         | 3060.66 | 2579.91  | 8193.26  | 7402.73  |
| 1110002J07Rik | 0.97    | 1.51     | 28.34    | 21.41    |
| Snhg18        | 55.36   | 55.50    | 178.73   | 197.80   |
| Rtl8c         | 2.47    | 1.57     | 28.54    | 33.48    |
| 5930403N24Rik | 1.00    | 2.07     | 26.85    | 27.31    |
| Igkv1-108     | 8.18    | 2.24     | 51.25    | 50.54    |
| Camk2a        | 35.90   | 43.14    | 119.28   | 116.43   |
| Naip6         | 265.92  | 165.47   | 741.37   | 571.94   |
| Clstn1        | 123.55  | 141.05   | 347.64   | 431.43   |
| Ptprs         | 447.57  | 454.79   | 1222.95  | 1116.04  |
| Robo1         | 1.50    | 1.01     | 26.19    | 42.07    |
| Megf8         | 27.38   | 32.96    | 97.15    | 84.22    |
| Col20a1       | 108.26  | 75.70    | 305.35   | 377.11   |
| E2f1          | 139.62  | 124.56   | 394.73   | 425.61   |
| Gm50462       | 0.50    | 1.00     | 23.96    | 26.31    |
| Slc35f2       | 43.79   | 38.77    | 137.60   | 143.75   |
| Prr11         | 28.10   | 21.09    | 121.05   | 91.18    |
| Ncapg         | 56.40   | 33.85    | 225.98   | 220.16   |
| Gm28417       | 96.07   | 111.94   | 283.23   | 375.55   |
| 4930451G09Rik | 69.42   | 55.94    | 212.32   | 177.69   |
| Grik5         | 67.30   | 64.74    | 201.47   | 244.08   |
| Plpp3         | 284.81  | 261.18   | 766.98   | 734.27   |
| Acot6         | 11.31   | 9.51     | 53.43    | 54.22    |
| Plscr4        | 2.92    | 0.56     | 30.55    | 28.27    |
| Rilpl2        | 1694.23 | 1831.22  | 4610.69  | 4947.39  |
| Nucb2         | 445.46  | 509.61   | 1168.83  | 1205.54  |
| Anln          | 25.11   | 16.11    | 114.37   | 87.11    |
| Rnasel        | 425.20  | 449.71   | 1136.46  | 1248.14  |
| Col6a6        | 5.42    | 7.05     | 54.18    | 64.36    |
| Poglut3       | 6.32    | 3.69     | 35.90    | 40.54    |
| Ptgr1         | 11.99   | 10.18    | 66.95    | 59.25    |

|               |         |         |          |          |
|---------------|---------|---------|----------|----------|
| Gm11998       | 163.87  | 77.76   | 512.42   | 329.03   |
| Jdp2          | 19.02   | 23.17   | 71.16    | 101.25   |
| Slc25a13      | 15.98   | 15.89   | 64.41    | 80.51    |
| 2900026A02Rik | 13.05   | 33.90   | 55.61    | 167.28   |
| Trim32        | 104.16  | 99.59   | 297.92   | 275.72   |
| Gm26574       | 5.89    | 5.26    | 35.54    | 43.10    |
| Tyrobp        | 465.86  | 392.41  | 1221.62  | 1045.60  |
| Zfp937        | 19.47   | 15.05   | 71.07    | 80.62    |
| Fbxo10        | 66.52   | 83.70   | 191.58   | 194.24   |
| Gm12679       | 8.20    | 6.66    | 48.67    | 56.18    |
| Rasl11a       | 5.33    | 3.13    | 34.74    | 47.24    |
| Hes1          | 1062.14 | 1134.24 | 2769.89  | 3278.48  |
| Cacna1e       | 4263.80 | 7272.93 | 10833.29 | 14981.43 |
| Cdca8         | 85.25   | 85.05   | 268.35   | 216.81   |
| Hspa12a       | 194.27  | 123.81  | 522.22   | 394.16   |
| Ube2r2        | 2009.02 | 2006.25 | 5193.06  | 5028.37  |
| Mtln          | 75.58   | 108.59  | 218.78   | 254.32   |
| Prkcz         | 79.34   | 51.93   | 245.76   | 252.14   |
| Edaradd       | 1315.66 | 1204.23 | 3420.32  | 3128.45  |
| Lrtm2         | 11.53   | 15.95   | 55.75    | 56.62    |
| Odc1          | 1595.12 | 2041.60 | 4334.96  | 4820.11  |
| Gramd1b       | 516.76  | 537.90  | 1324.77  | 1434.59  |
| Nmrk1         | 197.81  | 189.84  | 515.70   | 471.41   |
| Bsn           | 56.61   | 56.51   | 172.62   | 175.36   |
| Troap         | 17.50   | 7.39    | 70.44    | 66.02    |
| 2210414B05Rik | 32.34   | 25.23   | 108.19   | 121.76   |
| Myo10         | 67.26   | 51.75   | 210.26   | 173.31   |
| Erich2        | 3.35    | 1.00    | 33.21    | 16.19    |
| Traf1         | 1697.98 | 1833.77 | 4367.39  | 4626.43  |
| Neil3         | 18.64   | 10.13   | 125.26   | 99.43    |
| Arsb          | 286.98  | 283.13  | 736.93   | 678.08   |
| Tmem18        | 260.00  | 259.95  | 683.11   | 727.94   |
| Rad54b        | 21.80   | 18.58   | 85.10    | 62.00    |
| Rad54l        | 69.08   | 61.43   | 211.62   | 209.76   |
| Cblc          | 5.26    | 7.39    | 44.16    | 46.69    |
| Lpcat2        | 317.12  | 439.33  | 841.53   | 976.48   |
| Cipc          | 1205.43 | 1196.28 | 3002.07  | 3051.50  |
| Car9          | 7.77    | 13.32   | 38.17    | 43.13    |
| Acad8         | 73.83   | 57.35   | 208.78   | 168.11   |
| Borcs7        | 276.54  | 256.13  | 710.75   | 704.09   |
| Gm6377        | 2143.73 | 2599.47 | 6891.57  | 7411.19  |
| Gm20069       | 1.00    | 1.00    | 24.95    | 24.40    |
| Obscn         | 33.68   | 18.70   | 127.75   | 86.72    |
| Grhpr         | 415.54  | 427.45  | 1038.71  | 969.07   |

|               |          |          |          |          |
|---------------|----------|----------|----------|----------|
| Ankrd13b      | 13.98    | 14.55    | 59.32    | 54.10    |
| Morn1         | 38.78    | 33.85    | 114.79   | 136.24   |
| Gask1a        | 14.26    | 7.89     | 60.63    | 67.21    |
| Prag1         | 1136.81  | 1044.53  | 2946.55  | 2507.39  |
| Armc2         | 10.18    | 9.57     | 46.35    | 40.42    |
| Psap          | 14171.19 | 13832.63 | 34476.83 | 33472.35 |
| Gm6637        | 6.35     | 5.26     | 33.83    | 63.16    |
| Ak7           | 3.90     | 9.51     | 26.19    | 47.16    |
| Cit           | 111.19   | 96.39    | 323.87   | 294.22   |
| Rgs3          | 348.57   | 297.07   | 871.84   | 705.86   |
| Grk5          | 243.45   | 229.48   | 614.43   | 671.99   |
| Abcg3         | 579.93   | 456.74   | 1419.71  | 1213.58  |
| Fam228b       | 10.65    | 10.69    | 44.82    | 49.18    |
| Kif4          | 37.23    | 21.88    | 149.77   | 145.30   |
| Echdc3        | 20.83    | 19.53    | 70.75    | 67.81    |
| Kif2c         | 22.04    | 10.52    | 120.73   | 77.33    |
| Slc20a2       | 669.48   | 654.41   | 1619.64  | 1466.39  |
| Ctsb          | 2366.74  | 2561.84  | 5647.73  | 5725.78  |
| Kif23         | 236.85   | 192.20   | 636.43   | 480.20   |
| Bcl2a1b       | 91.10    | 109.71   | 244.55   | 316.21   |
| Myzap         | 200.93   | 210.21   | 497.03   | 487.67   |
| Kif15         | 101.28   | 76.09    | 331.21   | 287.54   |
| Cdca7l        | 150.56   | 119.96   | 388.37   | 517.73   |
| Plbd1         | 1037.65  | 1604.69  | 2488.58  | 3472.51  |
| 1700027J07Rik | 46.29    | 25.06    | 151.01   | 161.11   |
| Gm12493       | 5.75     | 4.08     | 39.80    | 47.59    |
| Hpgds         | 308.63   | 272.82   | 775.41   | 606.12   |
| Gm37145       | 46.10    | 50.24    | 133.91   | 137.64   |
| Prkar2a       | 263.18   | 295.89   | 664.32   | 679.64   |
| Plk1          | 44.72    | 42.08    | 146.08   | 121.81   |
| Tnfsf18       | 6.78     | 6.38     | 33.58    | 43.03    |
| Cenph         | 38.25    | 38.94    | 118.14   | 123.29   |
| 9530020I12Rik | 1.43     | 1.12     | 23.30    | 34.87    |
| Msl3l2        | 31.71    | 27.42    | 104.81   | 83.50    |
| Mki67         | 465.46   | 263.15   | 2558.08  | 2105.36  |
| Kif14         | 20.35    | 4.31     | 95.82    | 88.21    |
| Rnd3          | 8.75     | 11.64    | 35.99    | 80.10    |
| Top2a         | 384.97   | 249.89   | 1915.98  | 1466.68  |
| Acer2         | 8.84     | 10.74    | 39.52    | 60.73    |
| Cntln         | 39.63    | 40.17    | 122.16   | 125.04   |
| Oosp2         | 0.48     | 0.50     | 21.17    | 26.36    |
| Gm34829       | 1.00     | 3.25     | 23.55    | 51.08    |
| Tmtc2         | 2.42     | 0.56     | 23.73    | 20.24    |
| Pimreg        | 5.75     | 2.69     | 42.89    | 36.19    |

|               |         |         |         |         |
|---------------|---------|---------|---------|---------|
| Aurkb         | 160.61  | 136.18  | 435.96  | 340.21  |
| Ighv6-3       | 416.00  | 429.15  | 1002.33 | 969.69  |
| Ccnb2         | 56.18   | 50.47   | 175.69  | 155.58  |
| Pacc1         | 861.76  | 575.83  | 2016.53 | 1656.64 |
| Sbf2          | 254.32  | 195.84  | 612.85  | 555.42  |
| Serpina3g     | 828.42  | 1428.09 | 1990.89 | 3400.58 |
| Pik3r3        | 59.77   | 54.83   | 158.23  | 169.64  |
| Nipal4        | 1.00    | 3.81    | 21.55   | 36.21   |
| Tspear        | 22.42   | 17.51   | 68.40   | 78.07   |
| Gm12504       | 20.42   | 24.12   | 67.84   | 98.27   |
| Rab37         | 227.81  | 185.62  | 573.93  | 676.03  |
| Tmem41a       | 29.67   | 24.73   | 86.50   | 89.52   |
| Bcl7a         | 2534.02 | 2592.76 | 5952.91 | 5454.67 |
| Antxr1        | 4.37    | 2.13    | 27.18   | 21.79   |
| Cks1b         | 57.82   | 56.40   | 172.01  | 153.12  |
| Prc1          | 96.00   | 66.75   | 286.03  | 275.47  |
| C430002N11Rik | 15.43   | 8.89    | 55.58   | 70.03   |
| Grhl1         | 33.92   | 26.02   | 103.07  | 90.46   |
| C030013G03Rik | 0.97    | 0.56    | 19.71   | 16.74   |
| Mzt2          | 61.24   | 43.25   | 158.47  | 167.95  |
| Skida1        | 2.92    | 5.09    | 26.53   | 32.93   |
| Rnft2         | 24.55   | 11.13   | 76.02   | 77.02   |
| Src           | 8.27    | 11.64   | 34.51   | 50.64   |
| Tmem154       | 890.36  | 729.87  | 2721.97 | 2353.80 |
| Cenpe         | 143.92  | 107.93  | 406.21  | 299.12  |
| Zfp992        | 27.06   | 21.43   | 85.65   | 65.68   |
| As3mt         | 430.71  | 421.68  | 1002.40 | 1025.06 |
| Anxa9         | 63.87   | 61.89   | 166.22  | 173.36  |
| Abhd17c       | 441.57  | 428.53  | 1018.58 | 1011.32 |
| Aspm          | 75.34   | 60.26   | 242.54  | 179.84  |
| Mdfic         | 507.60  | 551.03  | 1167.55 | 1230.20 |
| Bcl2a1d       | 25.22   | 43.63   | 78.94   | 115.09  |
| Ccnf          | 113.90  | 80.41   | 289.74  | 255.10  |
| Hgfac         | 1.00    | 1.00    | 17.87   | 33.06   |
| Zfr2          | 45.26   | 39.00   | 121.41  | 128.39  |
| Mapre3        | 60.23   | 75.25   | 156.42  | 196.89  |
| Slc7a7        | 154.16  | 139.39  | 375.61  | 305.78  |
| Smim10l1      | 319.58  | 316.84  | 735.11  | 758.88  |
| Prob1         | 105.08  | 88.96   | 255.41  | 251.51  |
| Tspan31       | 369.35  | 368.13  | 865.68  | 828.74  |
| Actrt3        | 2.47    | 8.45    | 23.08   | 40.69   |
| Rundc3a       | 23.42   | 10.13   | 71.84   | 54.65   |
| Gbp7          | 564.06  | 579.13  | 1329.99 | 1422.09 |
| Pyroxd2       | 42.03   | 38.38   | 114.48  | 99.40   |

|               |         |         |         |         |
|---------------|---------|---------|---------|---------|
| Tenm4         | 120.31  | 97.97   | 285.97  | 228.72  |
| Zfp783        | 309.89  | 381.13  | 713.23  | 1016.64 |
| Slc29a1       | 327.05  | 331.31  | 757.75  | 835.27  |
| Klk8          | 4.85    | 20.42   | 26.31   | 69.53   |
| 6330562C20Rik | 14.78   | 14.21   | 55.95   | 49.17   |
| Btbd19        | 286.26  | 309.01  | 657.51  | 728.29  |
| Fhit          | 15.05   | 13.43   | 51.42   | 45.64   |
| Golim4        | 233.62  | 214.12  | 540.52  | 517.15  |
| Arhgef9       | 3.88    | 9.01    | 25.82   | 40.76   |
| Hcst          | 294.53  | 295.52  | 678.33  | 653.55  |
| Gmnn          | 160.17  | 146.35  | 386.55  | 517.39  |
| Zscan12       | 71.78   | 59.97   | 182.98  | 199.30  |
| Pif1          | 23.37   | 10.46   | 96.33   | 65.15   |
| F730043M19Rik | 114.92  | 97.60   | 311.66  | 318.44  |
| Lmo7          | 26.15   | 8.45    | 88.89   | 62.00   |
| Spc24         | 35.18   | 35.25   | 122.83  | 126.67  |
| Cenpm         | 20.26   | 24.45   | 68.43   | 71.90   |
| Fbxw17        | 159.49  | 149.42  | 380.03  | 526.86  |
| Trim6         | 9.63    | 28.59   | 37.52   | 89.28   |
| Wdfy2         | 2528.74 | 2687.37 | 5665.13 | 6154.06 |
| Zfp975        | 38.25   | 36.93   | 102.72  | 99.85   |
| Zdhhc1        | 107.04  | 110.90  | 255.98  | 285.10  |
| Pip4k2a       | 3438.55 | 3492.12 | 7700.52 | 7821.81 |
| Ptprv         | 175.13  | 155.31  | 402.52  | 410.14  |
| Fam83h        | 8.70    | 6.77    | 36.72   | 37.48   |
| Gm45206       | 32.37   | 34.47   | 92.53   | 101.43  |
| Phf19         | 362.15  | 394.54  | 819.35  | 834.58  |
| Rps6ka1       | 1607.53 | 1494.36 | 3577.51 | 3102.07 |
| Gm28802       | 9.20    | 10.40   | 37.20   | 46.09   |
| Wdr60         | 62.25   | 54.50   | 159.11  | 158.64  |
| Sema4b        | 4146.95 | 3791.79 | 9034.39 | 8488.48 |
| Sapcd2        | 5.85    | 5.93    | 41.24   | 40.16   |
| Kif11         | 87.17   | 51.09   | 556.33  | 433.83  |
| Slc25a4       | 1337.97 | 1479.30 | 2908.43 | 3286.13 |
| Gm13986       | 1.00    | 0.56    | 16.82   | 23.42   |
| Rogdi         | 1290.22 | 1167.72 | 2809.39 | 2905.37 |
| Egr2          | 405.89  | 624.67  | 955.73  | 1423.27 |
| Dna2          | 137.94  | 94.39   | 324.99  | 308.30  |
| Atp11a        | 18.97   | 15.44   | 56.57   | 105.77  |
| Selenbp1      | 17.93   | 23.44   | 59.01   | 70.72   |
| Gpr68         | 18.00   | 32.84   | 55.73   | 86.55   |
| Syngap1       | 45.72   | 32.18   | 117.96  | 92.94   |
| Ralb          | 209.70  | 238.80  | 466.29  | 511.64  |
| Cdc6          | 36.56   | 30.72   | 115.42  | 144.71  |

|               |         |         |          |          |
|---------------|---------|---------|----------|----------|
| Thyn1         | 104.33  | 79.17   | 245.68   | 235.85   |
| Ahcyl2        | 1074.91 | 1097.81 | 2334.39  | 2814.55  |
| Gm37759       | 8.73    | 3.81    | 36.67    | 26.83    |
| Lynx1         | 2021.00 | 2214.07 | 4528.52  | 5716.50  |
| Pld4          | 6574.94 | 5366.23 | 14098.68 | 11507.84 |
| Rabl2         | 37.58   | 45.10   | 97.07    | 108.66   |
| Nlrc3         | 1317.61 | 1278.04 | 2841.59  | 2900.81  |
| Slc43a1       | 202.11  | 126.97  | 488.88   | 408.23   |
| 2010016I18Rik | 248.02  | 257.63  | 549.16   | 618.15   |
| Slc36a4       | 150.79  | 123.95  | 352.00   | 348.93   |
| Spns3         | 497.46  | 481.75  | 1083.96  | 1023.19  |
| Copg2         | 1088.80 | 1157.25 | 2342.00  | 2421.08  |
| Gm50386       | 170.43  | 119.23  | 375.06   | 409.23   |
| Ccr5          | 78.80   | 68.15   | 185.71   | 177.13   |
| Diaph3        | 49.20   | 48.51   | 133.83   | 155.44   |
| Stmn1         | 51.13   | 51.65   | 142.49   | 138.49   |
| Kif5a         | 7.30    | 8.06    | 31.57    | 43.15    |
| Capn2         | 522.76  | 421.29  | 1121.88  | 947.85   |
| Espn          | 4.87    | 3.86    | 27.66    | 24.83    |
| Pde1c         | 17.95   | 21.99   | 53.86    | 73.54    |
| Arhgap27os3   | 799.95  | 861.47  | 1792.54  | 3014.09  |
| Ticrr         | 94.71   | 81.40   | 232.58   | 212.94   |
| Ndst1         | 4721.55 | 4140.83 | 9989.16  | 9695.28  |
| Atp6v1g2      | 72.82   | 75.20   | 168.30   | 186.49   |
| Klrb1f        | 44.62   | 32.79   | 110.40   | 123.44   |
| A730063M14Rik | 22.78   | 20.42   | 64.16    | 88.19    |
| Dnhd1         | 233.04  | 229.01  | 524.00   | 664.88   |
| Armc3         | 99.28   | 105.85  | 223.73   | 234.44   |
| Bbs5          | 6.85    | 4.76    | 28.79    | 34.01    |
| Sfmbt2        | 2.90    | 3.13    | 21.21    | 31.00    |
| Nsg2          | 10.65   | 9.96    | 39.05    | 37.96    |
| Serpinb6b     | 75.35   | 85.82   | 184.74   | 262.06   |
| Ank3          | 0.97    | 2.69    | 17.98    | 25.98    |
| St3gal4       | 69.99   | 66.14   | 164.10   | 162.81   |
| Parpbp        | 21.28   | 16.33   | 79.38    | 65.65    |
| 1700034H15Rik | 12.72   | 14.10   | 44.48    | 50.64    |
| Rcn1          | 163.02  | 178.15  | 355.12   | 430.78   |
| 4930581F22Rik | 110.04  | 100.55  | 245.42   | 249.12   |
| Arhgef39      | 37.33   | 40.95   | 93.86    | 101.79   |
| Tmcc3         | 517.58  | 451.69  | 1146.91  | 1107.26  |
| Kctd17        | 1.50    | 3.75    | 18.35    | 29.42    |
| Slc43a3       | 174.16  | 166.10  | 433.18   | 454.75   |
| Tmed6         | 5.37    | 6.77    | 26.39    | 37.45    |
| Tgm2          | 27.01   | 26.58   | 74.71    | 115.23   |

|         |         |         |         |         |
|---------|---------|---------|---------|---------|
| Abhd5   | 71.51   | 53.49   | 189.79  | 198.64  |
| Gm44260 | 99.09   | 79.18   | 223.55  | 213.63  |
| Car7    | 34.73   | 39.39   | 86.95   | 97.23   |
| Gm34121 | 13.12   | 7.72    | 44.76   | 47.45   |
| Slc12a5 | 23.42   | 25.73   | 69.01   | 200.18  |
| Ccdc116 | 80.78   | 87.28   | 178.72  | 201.60  |
| Mccc2   | 300.52  | 255.49  | 646.22  | 635.96  |
| Plekhg5 | 56.82   | 62.39   | 136.80  | 155.70  |
| Tlr7    | 1914.72 | 1267.31 | 4141.90 | 3502.47 |
| Gm28913 | 10.74   | 6.44    | 36.61   | 48.20   |
| Fanca   | 779.97  | 653.36  | 1613.78 | 1746.39 |
| Sfxn1   | 918.12  | 977.55  | 1890.47 | 2213.18 |



**Supp Table 4**

| <b>Gene</b>  | <b>WT FO</b> | <b>cKO FO</b> | <b>WT MZ</b> | <b>cKO MZ</b> |
|--------------|--------------|---------------|--------------|---------------|
| Gm4734       | 3.42         | 4.75          | 2.87         | 356.38        |
| Ngp          | 12.81        | 4.30          | 13.86        | 140.38        |
| Ltf          | 5.44         | 6.09          | 3.83         | 94.52         |
| Adgrd1       | 12.74        | 4.19          | 39.17        | 45.05         |
| Smox         | 10.82        | 9.45          | 36.68        | 73.92         |
| Specc1       | 18.38        | 21.53         | 52.70        | 122.76        |
| Pax6         | 3.92         | 6.88          | 7.17         | 137.56        |
| Sh2d1b1      | 7.71         | 2.62          | 32.85        | 46.94         |
| Gm48505      | 20.33        | 16.44         | 56.57        | 83.08         |
| Adgra2       | 20.42        | 23.83         | 45.53        | 103.17        |
| Art3         | 8.27         | 2.01          | 27.90        | 30.88         |
| Kif22        | 116.96       | 56.78         | 283.49       | 257.23        |
| Camp         | 6.40         | 3.57          | 8.53         | 53.04         |
| Snca         | 1.95         | 4.58          | 4.28         | 72.38         |
| Gm5915       | 6.40         | 3.69          | 3.83         | 53.43         |
| Gm15796      | 4.97         | 4.25          | 10.49        | 77.13         |
| Gm5236       | 1.00         | 2.62          | 1.48         | 100.49        |
| Atp2b4       | 12.08        | 6.43          | 14.96        | 57.73         |
| Aqp1         | 9.68         | 15.49         | 10.68        | 110.12        |
| Spire1       | 6.30         | 8.33          | 27.50        | 53.88         |
| Gpr34        | 25.45        | 58.06         | 161.99       | 534.53        |
| Rad51b       | 16.59        | 10.90         | 36.82        | 55.63         |
| Ttc41        | 59.62        | 50.74         | 129.66       | 164.98        |
| Poln         | 44.13        | 33.23         | 86.31        | 116.07        |
| Nrep         | 9.32         | 8.83          | 20.88        | 101.90        |
| Add2         | 1.97         | 4.19          | 8.14         | 43.65         |
| Serpina3e-ps | 3.90         | 6.20          | 2.90         | 93.23         |
| Prom1        | 7.32         | 3.74          | 15.10        | 34.82         |
| Gm46611      | 19.66        | 28.08         | 18.72        | 172.81        |
| Tspan33      | 5.37         | 3.63          | 6.94         | 46.08         |
| Trps1        | 635.81       | 540.50        | 1297.19      | 1516.94       |
| Eno2         | 12.67        | 9.89          | 17.91        | 72.35         |
| Timd2        | 10.65        | 1.00          | 40.04        | 33.22         |
| Ccdc122      | 35.45        | 39.60         | 83.76        | 134.06        |
| Fn1          | 51.87        | 15.05         | 57.81        | 103.37        |
| Sptb         | 22.92        | 26.29         | 38.57        | 132.65        |
| Otx2         | 1.97         | 3.74          | 1.96         | 64.88         |
| Mpo          | 2.47         | 9.39          | 4.28         | 78.35         |
| Epb42        | 6.40         | 7.66          | 4.71         | 69.94         |
| Znrf3        | 77.34        | 61.38         | 152.00       | 180.28        |
| Rad51        | 75.87        | 51.07         | 175.24       | 186.75        |
| Strip2       | 2.93         | 9.89          | 12.01        | 53.14         |

|               |        |        |         |         |
|---------------|--------|--------|---------|---------|
| Asns          | 12.27  | 14.04  | 36.54   | 65.99   |
| Rnase4        | 13.98  | 8.00   | 47.54   | 52.01   |
| Car1          | 20.47  | 14.93  | 14.76   | 84.24   |
| Aldoart2      | 1.50   | 2.06   | 3.35    | 80.40   |
| Gm17025       | 3.45   | 4.19   | 13.15   | 32.69   |
| Gm14892       | 1.00   | 1.00   | 1.93    | 101.54  |
| Optn          | 214.44 | 156.94 | 438.95  | 415.21  |
| Chil3         | 17.86  | 3.74   | 9.27    | 61.44   |
| Fggy          | 35.66  | 31.72  | 80.96   | 97.91   |
| 3000002C10Rik | 47.25  | 41.23  | 88.94   | 137.98  |
| Cdc45         | 107.10 | 84.03  | 252.54  | 261.20  |
| Alox5ap       | 42.77  | 40.95  | 85.95   | 124.42  |
| Zkscan7       | 202.95 | 166.72 | 423.58  | 431.68  |
| Ermap         | 30.90  | 26.34  | 36.74   | 107.96  |
| Nbdy          | 33.90  | 35.97  | 72.16   | 113.63  |
| Dclre1a       | 63.98  | 46.21  | 140.45  | 134.34  |
| Dmtn          | 1.00   | 2.57   | 4.28    | 35.01   |
| Gm43065       | 31.76  | 19.47  | 67.26   | 73.02   |
| Ggnbp1        | 37.54  | 42.90  | 68.92   | 127.79  |
| Ncapd3        | 703.61 | 524.10 | 1371.00 | 1294.35 |
| Sgip1         | 4.38   | 4.13   | 21.07   | 32.16   |
| Rorb          | 2.97   | 1.50   | 5.28    | 40.11   |
| Oip5          | 26.46  | 20.25  | 45.14   | 69.84   |
| Ank1          | 23.30  | 42.68  | 49.67   | 141.49  |
| Fam135a       | 8.73   | 2.51   | 23.06   | 26.35   |
| Gm15523       | 1.50   | 1.00   | 15.58   | 22.72   |
| Gm11942       | 29.36  | 40.95  | 49.08   | 140.08  |
| Chaf1a        | 122.20 | 110.65 | 292.02  | 332.77  |
| Gm43071       | 212.31 | 185.49 | 448.00  | 461.94  |
| Cip2a         | 138.89 | 97.47  | 288.36  | 266.97  |
| Rps19-ps4     | 3.42   | 6.26   | 1.93    | 45.73   |
| Nek2          | 59.70  | 41.45  | 138.49  | 157.74  |
| Trim10        | 3.88   | 6.65   | 4.28    | 76.29   |
| Zmat4         | 1.48   | 1.56   | 15.67   | 24.41   |
| Lmntd1        | 12.60  | 9.06   | 34.89   | 41.16   |
| Zfp985        | 7.30   | 10.23  | 23.06   | 44.62   |
| Ypel4         | 3.38   | 5.25   | 5.19    | 42.07   |
| Dmd           | 25.87  | 19.53  | 71.78   | 71.48   |
| Gm16216       | 2.45   | 3.74   | 5.19    | 38.53   |
| Car12         | 3.42   | 1.56   | 17.11   | 22.84   |
| Pon3          | 50.97  | 48.17  | 116.71  | 136.66  |
| Slc35g1       | 11.74  | 12.08  | 39.82   | 55.20   |
| Zfp518b       | 106.19 | 79.90  | 184.61  | 201.19  |
| Rad51ap1      | 68.68  | 47.61  | 153.88  | 146.45  |

|               |         |         |          |          |
|---------------|---------|---------|----------|----------|
| Gm12726       | 3.45    | 1.50    | 7.09     | 34.98    |
| Stk39         | 4.40    | 4.25    | 18.16    | 27.28    |
| 2900005J15Rik | 8.80    | 11.18   | 27.67    | 44.87    |
| 9530062K07Rik | 20.31   | 15.71   | 38.80    | 56.23    |
| Soat2         | 5.30    | 2.57    | 19.77    | 26.28    |
| C920021L13Rik | 121.02  | 97.62   | 257.92   | 260.22   |
| Hk3           | 30.15   | 28.14   | 64.45    | 83.80    |
| Myo3b         | 20.56   | 13.59   | 45.82    | 48.21    |
| BC147527      | 184.90  | 125.08  | 575.32   | 552.69   |
| Nova1         | 1.48    | 1.00    | 9.10     | 29.70    |
| Dennd2a       | 4.85    | 2.57    | 18.81    | 22.84    |
| Cryl1         | 208.74  | 188.87  | 404.50   | 451.77   |
| Gm11703       | 1.50    | 3.01    | 1.48     | 55.10    |
| Gm7312        | 1.97    | 3.07    | 3.35     | 45.84    |
| Zranb3        | 219.37  | 169.64  | 406.67   | 400.67   |
| Cbx2          | 71.96   | 46.21   | 153.26   | 122.24   |
| Cyb5r2        | 2.47    | 2.68    | 14.81    | 26.79    |
| Med12l        | 87.25   | 62.66   | 187.63   | 159.28   |
| Evi2a         | 1044.12 | 1058.72 | 2143.26  | 2429.96  |
| 44256         | 17.02   | 26.62   | 41.66    | 86.55    |
| Gm9159        | 5.40    | 7.38    | 5.22     | 62.83    |
| 1700029J07Rik | 390.04  | 344.87  | 793.28   | 782.01   |
| E230016M11Rik | 99.87   | 67.92   | 172.11   | 170.98   |
| Mest          | 57.29   | 57.56   | 117.08   | 159.62   |
| Akap17b       | 164.79  | 102.05  | 308.30   | 252.02   |
| Enah          | 9.73    | 5.14    | 13.57    | 31.66    |
| Zfp786        | 5.35    | 4.08    | 23.94    | 25.85    |
| Apof          | 48.27   | 35.12   | 107.57   | 113.41   |
| Gm4977        | 16.17   | 18.29   | 24.02    | 247.62   |
| Myo1b         | 5.92    | 9.11    | 17.31    | 38.60    |
| Gm5879        | 2.45    | 5.87    | 6.10     | 35.87    |
| Aifm2         | 20.90   | 36.13   | 54.99    | 98.20    |
| Ncapg2        | 148.06  | 96.66   | 342.79   | 294.06   |
| Dnph1         | 2.90    | 2.57    | 18.04    | 27.67    |
| Kel           | 1.95    | 4.13    | 3.26     | 57.35    |
| Fuca2         | 573.46  | 515.63  | 1193.30  | 1151.31  |
| Ube2e3        | 351.82  | 300.83  | 694.30   | 672.39   |
| Tmc1          | 15.71   | 11.52   | 48.41    | 47.09    |
| 44440         | 5.85    | 4.13    | 8.87     | 26.18    |
| Dennd2d       | 3154.38 | 2945.35 | 6269.47  | 6419.64  |
| Depdc1b       | 6.33    | 6.88    | 27.75    | 34.24    |
| Mst1          | 153.22  | 156.53  | 328.55   | 358.97   |
| Cd180         | 6455.01 | 7296.71 | 12912.29 | 16008.75 |
| Ska3          | 33.21   | 22.38   | 62.53    | 68.00    |

|               |         |         |          |          |
|---------------|---------|---------|----------|----------|
| Mageh1        | 7.80    | 8.78    | 22.49    | 36.08    |
| Lgalsl        | 31.52   | 24.22   | 69.91    | 78.71    |
| Ceacam16      | 450.12  | 378.71  | 819.22   | 828.97   |
| Gm32401       | 276.05  | 228.60  | 510.50   | 517.61   |
| Gda           | 9.16    | 10.23   | 11.64    | 65.00    |
| Gm12739       | 2.93    | 4.81    | 3.41     | 49.91    |
| Gm12912       | 12.58   | 18.29   | 23.60    | 346.64   |
| Klrg1         | 6.28    | 2.57    | 12.18    | 22.33    |
| Tctex1d2      | 95.80   | 79.15   | 218.67   | 195.71   |
| Zwilch        | 128.85  | 96.56   | 240.16   | 227.33   |
| Inca1         | 29.31   | 19.58   | 55.17    | 57.09    |
| Gm37607       | 42.63   | 27.41   | 68.52    | 79.43    |
| Apobr         | 25.61   | 18.96   | 61.59    | 58.36    |
| Dram2         | 982.37  | 845.01  | 1852.98  | 1816.60  |
| Cryzl2        | 138.22  | 157.28  | 258.58   | 350.75   |
| Gm35315       | 46.23   | 26.40   | 92.50    | 87.94    |
| Pam           | 7.35    | 6.71    | 22.91    | 30.52    |
| Gm43672       | 132.61  | 122.06  | 211.54   | 282.42   |
| Ppfia4        | 38.47   | 28.24   | 81.88    | 80.76    |
| Morrbid       | 9.73    | 9.89    | 34.08    | 39.00    |
| Zfp248        | 21.47   | 28.58   | 54.89    | 76.06    |
| Ccdc162       | 4.88    | 5.25    | 19.72    | 25.33    |
| Nol4l         | 16.71   | 16.56   | 50.69    | 56.61    |
| Nckap1        | 8.30    | 7.77    | 15.70    | 39.87    |
| Tssk4         | 34.50   | 29.75   | 77.76    | 80.00    |
| Adam15        | 101.38  | 91.36   | 172.77   | 216.25   |
| Fscn1         | 9.77    | 10.29   | 30.73    | 41.02    |
| Gm6749        | 1.50    | 2.06    | 1.96     | 30.34    |
| Cdc25c        | 14.93   | 9.50    | 51.08    | 41.30    |
| Extl2         | 74.32   | 54.94   | 164.60   | 141.38   |
| Gm19345       | 139.60  | 117.48  | 278.71   | 262.32   |
| S100a9        | 14.33   | 15.37   | 20.34    | 316.92   |
| Smim24        | 63.12   | 59.92   | 144.41   | 143.04   |
| Igfbp5        | 3.40    | 2.51    | 6.72     | 37.00    |
| Smad6         | 1.50    | 1.56    | 17.54    | 19.29    |
| Ccnb1         | 36.02   | 21.31   | 60.65    | 72.32    |
| Meis1         | 11.70   | 15.55   | 13.63    | 66.75    |
| 4930426D05Rik | 1248.44 | 1120.60 | 2411.38  | 2348.34  |
| Entpd1        | 415.17  | 433.65  | 867.22   | 940.61   |
| AU020206      | 5213.93 | 5153.65 | 10420.42 | 10767.02 |
| Catsperg1     | 39.13   | 21.42   | 46.93    | 60.79    |
| Fancd2        | 101.02  | 84.92   | 229.61   | 207.68   |
| Fsd2          | 33.52   | 34.45   | 73.88    | 89.11    |
| Insyn1        | 4.42    | 2.62    | 21.79    | 20.30    |

|          |         |         |         |         |
|----------|---------|---------|---------|---------|
| Pfn2     | 64.04   | 46.10   | 67.03   | 124.05  |
| Fads6    | 4.40    | 2.62    | 19.09   | 19.29   |
| Cyp2u1   | 5.42    | 6.76    | 23.51   | 28.87   |
| Gm12988  | 3.95    | 4.13    | 8.93    | 41.18   |
| Pbx4     | 152.64  | 131.37  | 304.33  | 285.95  |
| Cd59b    | 1.00    | 6.20    | 14.48   | 28.91   |
| Mcrip2   | 20.42   | 17.34   | 34.18   | 50.61   |
| Prr22    | 37.85   | 35.64   | 72.35   | 89.54   |
| Serpinb9 | 119.97  | 129.41  | 235.20  | 297.87  |
| Tmcc2    | 54.16   | 42.79   | 39.90   | 277.02  |
| Dapk2    | 2.97    | 1.56    | 8.96    | 19.11   |
| St14     | 837.43  | 942.43  | 1688.54 | 1964.77 |
| Tbc1d24  | 39.06   | 40.62   | 73.31   | 98.80   |
| Gm18119  | 5.40    | 6.26    | 5.70    | 41.15   |
| Gpr179   | 5.87    | 7.21    | 24.16   | 30.44   |
| F11r     | 4.97    | 3.07    | 23.06   | 22.81   |
| Kif20a   | 103.08  | 93.16   | 238.20  | 234.23  |
| Wdr6     | 1642.58 | 1468.92 | 3224.44 | 3075.50 |
| Bub1b    | 181.10  | 147.12  | 432.24  | 373.28  |
| M1ap     | 36.42   | 37.37   | 63.88   | 92.41   |
| Gm50253  | 4.88    | 4.75    | 17.34   | 24.46   |
| Gm10644  | 46.79   | 32.56   | 74.67   | 80.71   |
| Nlgn2    | 5.33    | 8.94    | 27.90   | 39.34   |
| Aldh1l2  | 24.25   | 14.82   | 40.83   | 46.01   |
| Gm44250  | 32.05   | 33.11   | 80.70   | 84.67   |
| Lcn2     | 3.99    | 5.14    | 2.36    | 49.92   |
| Pglyrp2  | 872.99  | 862.41  | 1650.21 | 1775.18 |
